# Supplementary material for: Carbonylation of tertiary carbon radicals: synthesis of lactams
Source: Royal Society of Chemistry journal article supplement (doi:10.1039/c9cc02112d), 2019-01-01

# Supporting Information

## Contents

|                                                                                   |   |
|-----------------------------------------------------------------------------------|---|
| 1. General comments .....                                                         | 2 |
| 2. General procedures .....                                                       | 2 |
| 2.1 General procedures for the synthesis of start materials. <sup>[1]</sup> ..... | 2 |
| 2.2 General procedure for the cabonylation of tertiary carbon radicals .....      | 3 |
| 3. Spectroscopic Data of Products .....                                           | 4 |
| 4. References .....                                                               | 8 |
| 5. Copy of <sup>1</sup> H and <sup>13</sup> C NMR Spectra of Products .....       | 9 |

## 1. General comments

Chemicals were purchased from Sigma-Aldrich, Strem, Acros, TCI or Alfa Aesar and used as such unless stated otherwise. NMR spectra were recorded on Bruker Avance 300 and Bruker ARX 400 spectrometers. All solvents and reagents were purchased from Sigma-Aldrich and used as received. Chemical shifts (ppm) are given relative to solvent: references for CDCl<sub>3</sub> were 7.26 ppm (<sup>1</sup>H NMR) and 77.00 ppm (<sup>13</sup>C NMR). Multiplets were assigned as s (singlet), d (doublet), t (triplet), q (quartet), p (pentet), dd (doublet of doublet), m (multiplet) and br.s (broad singlet). GC-yields were calculated using hexadecane as internal standard. All measurements were carried out at room temperature unless otherwise stated. Electron impact (EI) mass spectra were recorded on AMD 402 mass spectrometer (70 eV). High resolution mass spectra (HRMS) were recorded on Agilent 6210. The data are given as mass units per charge (m/z). Gas chromatography analysis was performed on an Agilent HP-7890A instrument with a FID detector and HP-5 capillary column (polydimethylsiloxane with 5% phenyl groups, 30 m, 0.32 mm i.d. 0.25 μm film thickness) using argon as carrier gas. The products were isolated from the reaction mixture by column chromatography on silica gel 60, 0.063-0.2 mm, 70-230 mesh (Merck).

## 2. General procedures

### 2.1 General procedures for the synthesis of start materials.<sup>[1]</sup>

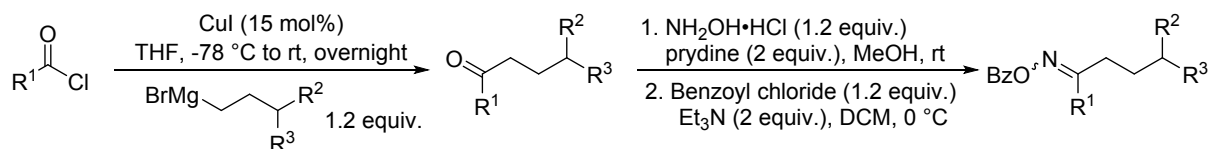

#### Step 1

To a 100 mL three-necked flask was charged with CuI (0.15 equiv), the flask was evacuated and backfilled with nitrogen (3 times). Dry THF (0.5 M) and the acid chloride (1.0 equiv) was added. The solution was cooled to –78 °C and grignard reagent (1.2 equiv) was added dropwise. Then the mixture was warmed to room temperature for 6 h. The reaction was quenched with an aqueous solution of saturated NH<sub>4</sub>Cl. The layers were separated and the aqueous layer was extracted with ethyl acetate. The combined organic layers were washed with brine, dried (Na<sub>2</sub>SO<sub>4</sub>). Then the solution was filtered, concentrated to give the crude ketones, which were used in the next step without further purification.

#### Step 2

A mixture of ketone (1.0 equiv), hydroxylamine hydrochloride (1.2 equiv) and pyridine (2.0 equiv) were dissolved in MeOH (0.5 M). The mixture stirred at room temperature for 3 h. Then MeOH was removed by concentration, the residue was diluted with 1M HCl aqueous solution and ethyl acetate. The layers were separated and the aqueous layer was extracted with ethyl acetate. The combined organic layers were washed with saturated NaHCO<sub>3</sub> solution, brine, dried (Na<sub>2</sub>SO<sub>4</sub>), and concentrated to give the crude ketone oximes, which were used in the next step without further purification.

To a mixture of ketone oxime (1.0 equiv), triethylamine (2.0 equiv) and DCM (0.5 M) in a 100 mL three-necked flask was added benzoyl chloride (1.2 equiv) at 0 °C. After addition, the reaction mixture was stirred at same temperature for half hours. The reaction was quenched with an aqueous solution of saturated NaHCO<sub>3</sub>. The

layers were separated and the aqueous layer was extracted with DCM. The combined organic layers were washed with brine, dried ( $\text{Na}_2\text{SO}_4$ ). Then the solution was filtered, concentrated to give the crude oxime esters. Purification by column chromatography on silica gel (Pentane/ethyl acetate 10:1), gave the corresponding products.

## 2.2 General procedure for the carbonylation of tertiary carbon radicals

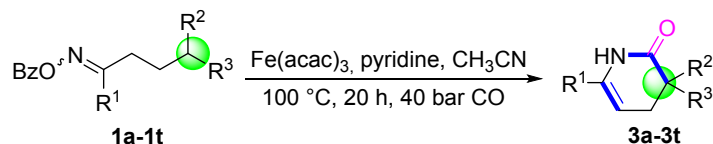

To each screw-cap vial (4 ml) equipped with a septum, a small cannula, and a stirring bar was added oxime esters (0.20 mmol),  $\text{Fe}(\text{acac})_3$  (7.0 mg, 0.02 mmol) and  $\text{CH}_3\text{CN}$  (3 mL). The vials then were purged with argon three times before placed on an alloy plate and transferred into a 300 mL autoclave of the 4560 series from Parr instruments under air. After flushing the autoclave three times with  $\text{CO}$ , a pressure of 40 bar  $\text{CO}$  was set and the reaction was performed for 16 hours at 100 °C. Afterwards, the autoclave was cooled to room temperature and the pressure was released carefully. The solvent was removed under reduced pressure and the crude products were purified by column chromatography on silica gel (eluent: pentane/ethyl acetate = 5:1).

### 3. Spectroscopic Data of Products

#### 3,3,6-Trimethyl-3,4-dihydropyridin-2(1H)-one

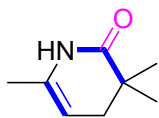

22.5 mg, white solid, yield: 81%.

$^1\text{H}$  NMR (300 MHz,  $\text{CDCl}_3$ )  $\delta$  8.09 – 7.77 (br.s, 1H), 4.76 (tt,  $J$  = 2.9, 1.5 Hz, 1H), 2.11 (dd,  $J$  = 4.2, 2.0 Hz, 2H), 1.80 (q,  $J$  = 1.7 Hz, 3H), 1.16 (s, 6H).

$^{13}\text{C}$  NMR (75 MHz,  $\text{CDCl}_3$ )  $\delta$  178.34, 132.03, 99.93, 36.41, 35.54, 24.60, 18.62.

GC-MS (EI, 70ev):  $m/z$  (%) = 139 ( $\text{M}^+$ , 47), 124 (27), 96 (32), 83 (16), 70 (100), 42 (27).

HRMS (ESI) Calc. for  $\text{C}_{13}\text{H}_{13}\text{NO}$  ( $\text{M}+\text{H}^+$ ): 140.1075; found: 140.1073.

#### 6-Cyclopropyl-3,3-dimethyl-3,4-dihydropyridin-2(1H)-one

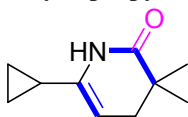

23.1 mg, white solid, yield: 70%.

$^1\text{H}$  NMR (300 MHz,  $\text{CDCl}_3$ )  $\delta$  7.04 (br.s, 1H), 4.82 – 4.69 (m, 1H), 2.10 (dd,  $J$  = 4.5, 1.6 Hz, 2H), 1.41 – 1.28 (m, 1H), 1.14 (s, 6H), 0.75 – 0.63 (m, 2H), 0.56 – 0.45 (m, 2H).

$^{13}\text{C}$  NMR (75 MHz,  $\text{CDCl}_3$ )  $\delta$  177.07, 137.53, 98.14, 36.77, 35.38, 24.61, 12.75, 4.42.

GC-MS (EI, 70ev):  $m/z$  (%) = 165 ( $\text{M}^+$ , 67), 150 (100), 137 (37), 122 (51), 96 (97), 83 (44), 70 (51).

HRMS (ESI) Calc. for  $\text{C}_{10}\text{H}_{15}\text{NO}$  ( $\text{M}+\text{H}^+$ ): 166.1232; found: 166.1228.

#### 6-Cyclobutyl-3,3-dimethyl-3,4-dihydropyridin-2(1H)-one

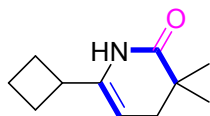

24.3 mg, white solid, yield: 68%.

$^1\text{H}$  NMR (400 MHz,  $\text{CDCl}_3$ )  $\delta$  6.82 (br.s, 1H), 4.81 – 4.71 (m, 1H), 3.03 – 2.82 (m, 1H), 2.20 – 2.05 (m, 4H), 2.07 – 1.87 (m, 3H), 1.86 – 1.75 (m, 1H), 1.15 (s, 6H).

$^{13}\text{C}$  NMR (100 MHz,  $\text{CDCl}_3$ )  $\delta$  177.29, 139.29, 97.23, 36.86, 36.80, 35.39, 26.15, 24.64, 17.94.

GC-MS (EI, 70ev):  $m/z$  (%) = 179 ( $\text{M}^+$ , 81), 164 (16), 151 (100), 136 (65), 123 (42), 109 (45), 82 (46), 70 (35).

HRMS (ESI) Calc. for  $\text{C}_{11}\text{H}_{17}\text{NO}$  ( $\text{M}+\text{H}^+$ ): 180.1388; found: 180.1389.

#### 6-Cyclopentylidene-3,3-dimethylpiperidin-2-one

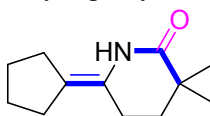

20.8 mg, colorless oil, yield: 54%.

$^1\text{H}$  NMR (400 MHz,  $\text{CDCl}_3$ )  $\delta$  6.87 (br.s, 1H), 2.49 – 2.34 (m, 2H), 2.25 – 2.06 (m, 4H), 1.76 – 1.61 (m, 6H), 1.24 (s, 6H).

$^{13}\text{C}$  NMR (101 MHz,  $\text{CDCl}_3$ )  $\delta$  175.61, 124.68, 117.08, 37.61, 34.07, 29.54, 27.87, 26.88, 26.75, 25.84, 22.23.

GC-MS (EI, 70ev):  $m/z$  (%) = 193 ( $\text{M}^+$ , 100), 178 (48), 165 (42), 152 (46), 122 (30), 96 (27), 41 (27).

HRMS (ESI) Calc. for  $\text{C}_{12}\text{H}_{19}\text{NO}$  ( $\text{M}+\text{H}^+$ ): 194.1545; found: 194.1553.

#### Methyl 3-(5,5-dimethyl-6-oxo-1,4,5,6-tetrahydropyridin-2-yl)propanoate

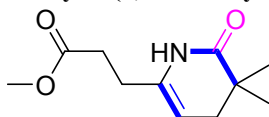

21.1 mg, white solid, yield: 50%.

$^1\text{H}$  NMR (400 MHz,  $\text{CDCl}_3$ )  $\delta$  7.43 (s, 1H), 4.83 – 4.75 (m, 1H), 3.70 (s, 3H), 2.54 (td,  $J$  = 7.1, 0.9 Hz, 2H), 2.40 (ddt,  $J$  = 8.2, 7.0, 1.1 Hz, 2H), 2.11 (d,  $J$  = 4.4 Hz, 2H), 1.14 (s, 6H).

$^{13}\text{C}$  NMR (100 MHz,  $\text{CDCl}_3$ )  $\delta$  177.27, 173.30, 135.12, 99.88, 51.89, 36.54, 35.44, 32.06, 27.83, 24.57.

GC-MS (EI, 70ev):  $m/z$  (%) = 211 ( $\text{M}^+$ , 85), 196 (59), 183 (21), 164 (41), 152 (85), 136 (33), 110 (100), 82 (56), 70 (54).

HRMS (ESI) Calc. for C<sub>11</sub>H<sub>17</sub>NO<sub>3</sub> (M+H<sup>+</sup>): 212.1286; found: 212.1288.

### 3-Methyl-2-azaspiro[5.5]undec-3-en-1-one

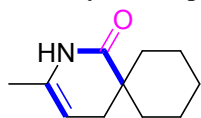

18.3 mg, white solid, yield: 51%.

<sup>1</sup>H NMR (300 MHz, CDCl<sub>3</sub>) δ 6.66 (s, 1H), 4.73 (tt, *J* = 4.5, 1.5 Hz, 1H), 2.26 – 2.16 (m, 2H), 1.84–1.71 (m, 5H), 1.66 – 1.52 (m, 3H), 1.53 – 1.30 (m, 5H).

<sup>13</sup>C NMR (75 MHz, CDCl<sub>3</sub>) δ 177.08, 131.78, 99.16, 39.59, 31.62, 29.84, 25.89, 21.31, 18.70.

GC-MS (EI, 70ev): *m/z* (%) = 179 (M<sup>+</sup>, 97), 162 (37), 150 (70), 136 (72), 123 (100), 110 (35), 94 (37), 70 (61).

HRMS (ESI) Calc. for C<sub>11</sub>H<sub>17</sub>NO<sub>2</sub> (M+H<sup>+</sup>): 180.1388; found: 180.1389.

### 3-(*p*-Tolyl)-2-azaspiro[5.5]undec-3-en-1-one

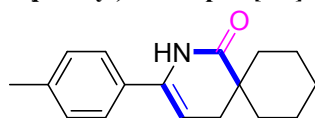

27.0 mg, white solid, yield: 53%.

<sup>1</sup>H NMR (300 MHz, CDCl<sub>3</sub>) δ 7.34 – 7.24 (m, 2H), 7.23 – 7.13 (m, 2H), 6.96 (br.s, 1H), 5.33 (td, *J* = 4.9, 1.8 Hz, 1H), 2.42 (d, *J* = 4.8 Hz, 2H), 2.36 (s, 3H), 1.90 – 1.76 (m, 2H), 1.71 – 1.35 (m, 8H).

<sup>13</sup>C NMR (75 MHz, CDCl<sub>3</sub>) δ 177.11, 138.59, 136.03, 132.15, 129.53, 124.52, 100.37, 39.85, 31.59, 30.35, 25.92, 21.41, 21.18.

GC-MS (EI, 70ev): *m/z* (%) = 255 (M<sup>+</sup>, 57), 227 (100), 212 (29), 199 (37), 170 (17), 146 (45), 118 (22).

### (*S*)-3,6-Dimethyl-3-(4-methylpentyl)-3,4-dihydropyridin-2(1*H*)-one

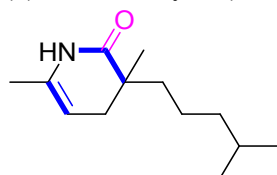

23.4 mg, colorless oil, yield: 56%.

<sup>1</sup>H NMR (300 MHz, CDCl<sub>3</sub>) δ 6.68 (s, 1H), 4.72 (tp, *J* = 4.6, 1.4 Hz, 1H), 2.28 – 2.12 (m, 1H), 2.14 – 1.99 (m, 1H), 1.77 (q, *J* = 1.7 Hz, 3H), 1.60 – 1.41 (m, 3H), 1.32 – 1.22 (m, 2H), 1.21 – 1.08 (m, 5H), 0.86 (d, *J* = 6.6 Hz, 6H).

<sup>13</sup>C NMR (75 MHz, CDCl<sub>3</sub>) δ 176.69, 131.65, 99.54, 39.90, 39.49, 37.04, 33.13, 27.86, 22.64, 22.62, 22.60, 21.67, 18.77.

GC-MS (EI, 70ev): *m/z* (%) = 209 (M<sup>+</sup>, 26), 166 (11), 125 (71), 97 (100), 70 (17), 41 (16).

HRMS (ESI) Calc. for C<sub>13</sub>H<sub>23</sub>NO (M+H<sup>+</sup>): 210.1858; found: 210.1855.

### (*S*)-3-Methyl-3-(4-methylpentyl)-6-(*p*-tolyl)-3,4-dihydropyridin-2(1*H*)-one

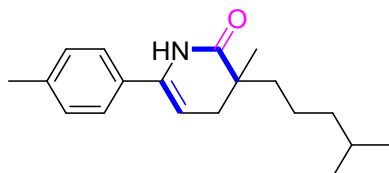

35.3 mg, white solid, yield: 62%.

<sup>1</sup>H NMR (300 MHz, CDCl<sub>3</sub>) δ 7.35 – 7.27 (m, 2H), 7.18 (dt, *J* = 8.0, 0.7 Hz, 2H), 7.02 (s, 1H), 5.32 (ddd, *J* = 5.1, 4.4, 1.8 Hz, 1H), 2.46 – 2.22 (m, 5H), 1.65 – 1.45 (m, 3H), 1.36 – 1.25 (m, 2H), 1.20 (s, 3H), 1.18 – 1.06 (m, 2H), 0.85 (d, *J* = 6.6 Hz, 6H).

<sup>13</sup>C NMR (75 MHz, CDCl<sub>3</sub>) δ 176.68, 138.60, 135.97, 132.23, 129.55, 124.55, 100.77, 40.20, 39.46, 36.89, 33.55, 27.83, 22.65, 22.57, 22.42, 21.73, 21.17.

GC-MS (EI, 70ev): *m/z* (%) = 285 (M<sup>+</sup>, 25), 242 (7), 201 (62), 186 (13), 173 (100), 146 (12), 118(11), 41 (8).

### 3,3-Dimethyl-6-phenyl-3,4-dihydropyridin-2(1*H*)-one <sup>[2]</sup>

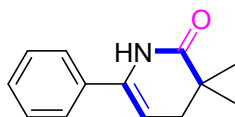

28.1 mg, white solid, yield: 70%.

$^1\text{H NMR}$  (300 MHz,  $\text{CDCl}_3$ )  $\delta$  7.49 – 7.31 (m, 5H), 7.32 – 7.21 (br.s, 1H), 5.39 (td,  $J = 4.7, 1.9$  Hz, 1H), 2.34 (d,  $J = 4.7$  Hz, 2H), 1.23 (s, 6H).

$^{13}\text{C NMR}$  (75 MHz,  $\text{CDCl}_3$ )  $\delta$  177.20, 136.31, 135.00, 128.87, 128.63, 124.74, 101.68, 36.83, 35.97, 24.55.

GC-MS (EI, 70ev):  $m/z$  (%) = 201 ( $\text{M}^+$ , 100), 186 (85), 173 (35), 158 (65), 132 (84), 104 (37), 77 (33).

HRMS (ESI) Calc. for  $\text{C}_{13}\text{H}_{15}\text{NO}_2$  ( $\text{M}+\text{H}^+$ ): 202.1232; found: 202.1230.

### 3,3-Dimethyl-6-(*p*-tolyl)-3,4-dihydropyridin-2(1H)-one

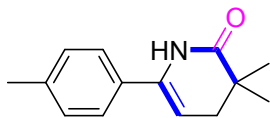

37.4 mg, white solid, yield: 87%.

$^1\text{H NMR}$  (300 MHz,  $\text{CDCl}_3$ )  $\delta$  7.30 (d,  $J = 8.2$  Hz, 2H), 7.23 – 7.16 (m, 2H), 7.13 (br.s, 1H), 5.35 (td,  $J = 4.7, 1.8$  Hz, 1H), 2.36 (s, 3H), 2.33 (d,  $J = 4.7$  Hz, 2H), 1.23 (s, 6H).

$^{13}\text{C NMR}$  (75 MHz,  $\text{CDCl}_3$ )  $\delta$  177.28, 138.66, 136.13, 132.17, 129.56, 124.57, 100.97, 36.88, 35.94, 24.54, 21.18.

GC-MS (EI, 70ev):  $m/z$  (%) = 215 ( $\text{M}^+$ , 96), 200 (100), 187 (32), 172 (66), 146 (67), 133 (18), 118 (33), 91 (20), 70 (16).

### 6-(4-(*tert*-Butyl)phenyl)-3,3-dimethyl-3,4-dihydropyridin-2(1H)-one

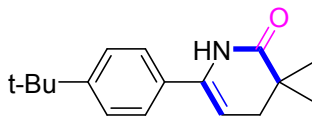

38.0 mg, white solid, yield: 74%.

$^1\text{H NMR}$  (300 MHz,  $\text{CDCl}_3$ )  $\delta$  7.44 – 7.38 (m, 2H), 7.37 – 7.31 (m, 2H), 7.00 (s, 1H), 5.37 (td,  $J = 4.7, 1.8$  Hz, 1H), 2.33 (d,  $J = 4.7$  Hz, 2H), 1.33 (s, 9H), 1.23 (s, 6H).

$^{13}\text{C NMR}$  (75 MHz,  $\text{CDCl}_3$ )  $\delta$  177.10, 151.91, 136.04, 132.12, 125.84, 124.35, 101.08, 36.90, 35.96, 34.67, 31.24, 24.53.

GC-MS (EI, 70ev):  $m/z$  (%) = 257 ( $\text{M}^+$ , 81), 242 (100), 229 (37), 214 (56), 200 (38), 172 (24), 132 (27), 70 (7).

### 6-(4-Methoxyphenyl)-3,3-dimethyl-3,4-dihydropyridin-2(1H)-one

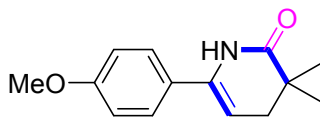

41.6 mg, white solid, yield: 90%.

$^1\text{H NMR}$  (300 MHz,  $\text{CDCl}_3$ )  $\delta$  7.41 – 7.29 (m, 2H), 7.25 (s, 1H), 6.96 – 6.84 (m, 2H), 5.27 (td,  $J = 4.7, 1.8$  Hz, 1H), 3.82 (s, 3H), 2.31 (d,  $J = 4.7$  Hz, 2H), 1.22 (s, 6H).

$^{13}\text{C NMR}$  (75 MHz,  $\text{CDCl}_3$ )  $\delta$  177.27, 159.89, 135.92, 127.63, 126.05, 114.19, 100.13, 55.36, 36.87, 35.92, 24.53.

GC-MS (EI, 70ev):  $m/z$  (%) = 231 ( $\text{M}^+$ , 94), 216 (100), 203 (27), 188 (67), 162 (36), 134 (35), 77 (14).

HRMS (ESI) Calc. for  $\text{C}_{14}\text{H}_{17}\text{NO}_2$  ( $\text{M}+\text{H}^+$ ): 232.1337; found: 232.1340.

### 3,3-Dimethyl-6-(*m*-tolyl)-3,4-dihydropyridin-2(1H)-one

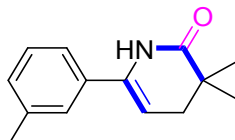

30.5 mg, white solid, yield: 71%.

$^1\text{H NMR}$  (300 MHz,  $\text{CDCl}_3$ )  $\delta$  7.31 – 7.07 (m, 5H), 5.38 (td,  $J = 4.7, 1.8$  Hz, 1H), 2.37 (s, 3H), 2.33 (d,  $J = 4.7$  Hz, 2H), 1.23 (s, 6H).

$^{13}\text{C NMR}$  (75 MHz,  $\text{CDCl}_3$ )  $\delta$  177.13, 138.63, 136.33, 134.97, 129.39, 128.79, 125.40, 121.85, 101.44, 36.86, 35.96, 24.54, 21.44.

GC-MS (EI, 70ev):  $m/z$  (%) = 215 ( $\text{M}^+$ , 96), 200 (100), 187 (32), 172 (66), 146 (67), 133 (18), 118 (33), 91 (20), 70 (16).

### 6-(2-Methoxyphenyl)-3,3-dimethyl-3,4-dihydropyridin-2(1H)-one

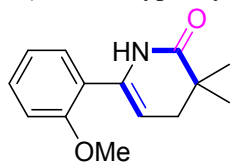

24.5 mg, white solid, yield: 53%.

$^1\text{H NMR}$  (400 MHz, Chloroform-*d*)  $\delta$  7.54 (br.s, 1H), 7.41 – 7.28 (m, 2H), 7.03 – 6.86 (m, 2H), 5.26 (td,  $J = 4.7$ , 1.8 Hz, 1H), 3.85 (s, 3H), 2.32 (d,  $J = 4.7$  Hz, 2H), 1.23 (s, 6H).

$^{13}\text{C NMR}$  (101 MHz,  $\text{CDCl}_3$ )  $\delta$  176.38, 156.34, 135.78, 129.98, 129.48, 123.90, 121.08, 111.12, 103.72, 55.59, 36.51, 36.11, 24.56.

GC-MS (EI, 70ev):  $m/z$  (%) = 231 ( $\text{M}^+$ , 94), 216 (100), 203 (27), 188 (67), 162 (36), 134 (35), 77 (14).

### 6-(2-Bromophenyl)-3,3-dimethyl-3,4-dihydropyridin-2(1H)-one

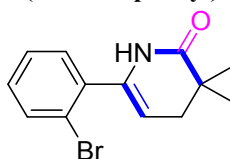

44.4 mg, white solid, yield: 79%.

$^1\text{H NMR}$  (400 MHz,  $\text{CDCl}_3$ )  $\delta$  7.59 (dt,  $J = 7.9$ , 0.8 Hz, 1H), 7.35 – 7.30 (m, 2H), 7.22 (dt,  $J = 7.9$ , 4.6 Hz, 1H), 6.81 (s, 1H), 5.12 (td,  $J = 4.5$ , 1.9 Hz, 1H), 2.33 (d,  $J = 4.5$  Hz, 2H), 1.28 (s, 6H).

$^{13}\text{C NMR}$  (101 MHz,  $\text{CDCl}_3$ )  $\delta$  176.17, 136.54, 136.25, 133.36, 131.07, 130.27, 127.64, 122.26, 104.72, 36.57, 35.87, 24.53.

GC-MS (EI, 70ev):  $m/z$  (%) = 281 ( $\text{M}^+$ ,  $^{81}\text{Br}$ , 98), 279 ( $\text{M}^+$ ,  $^{79}\text{Br}$ , 100), 266 (70), 253 (51), 236 (54), 210 (41), 181 (27), 157 (29), 131 (68), 83 (67), 70 (62).

HRMS (ESI) Calc. for  $\text{C}_{13}\text{H}_{14}\text{NOBr}$  ( $\text{M}+\text{H}^+$ ): 280.0337; found: 280.0335.

### 6-(2-Fluorophenyl)-3,3-dimethyl-3,4-dihydropyridin-2(1H)-one

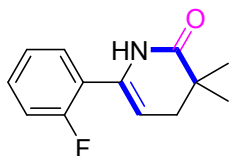

27.2 mg, white solid, yield: 62%.

$^1\text{H NMR}$  (400 MHz,  $\text{CDCl}_3$ )  $\delta$  7.40 – 7.28 (m, 2H), 7.20 – 7.07 (m, 2H), 7.03 (br.s, 1H), 5.38 (tdd,  $J = 4.7$ , 1.9, 0.8 Hz, 1H), 2.35 (d,  $J = 4.7$  Hz, 2H), 1.25 (s, 6H).

$^{13}\text{C NMR}$  (100 MHz,  $\text{CDCl}_3$ )  $\delta$  176.47, 159.50 (d,  $J = 248$  Hz), 131.91, 130.19 (d,  $J = 8$  Hz), 128.61 (d,  $J = 3$  Hz), 124.56 (d,  $J = 3$  Hz), 122.92 (d,  $J = 12$  Hz), 116.30 (d,  $J = 22$  Hz), 105.17 (d,  $J = 3$  Hz), 36.58, 36.02, 24.53.

GC-MS (EI, 70ev):  $m/z$  (%) = 219 ( $\text{M}^+$ , 100), 204 (72), 191 (27), 176 (70), 150 (87), 122 (24), 70 (29).

HRMS (ESI) Calc. for  $\text{C}_{13}\text{H}_{14}\text{NOF}$  ( $\text{M}+\text{H}^+$ ): 220.1137; found: 220.1141.

### 6-(4-Bromo-3-methylphenyl)-3,3-dimethyl-3,4-dihydropyridin-2(1H)-one

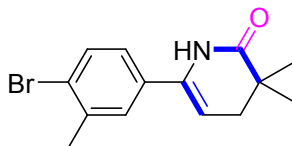

30.1 mg, white solid, yield: 51%.

$^1\text{H NMR}$  (300 MHz, Chloroform-*d*)  $\delta$  7.52 (d,  $J = 8.3$  Hz, 1H), 7.33 – 7.28 (m, 1H), 7.25 (br.s, 1H), 7.10 (ddd,  $J = 8.3$ , 2.4, 0.6 Hz, 1H), 5.38 (td,  $J = 4.7$ , 1.8 Hz, 1H), 2.41 (q,  $J = 0.5$  Hz, 3H), 2.32 (d,  $J = 4.7$  Hz, 2H), 1.22 (s, 6H).

$^{13}\text{C NMR}$  (75 MHz,  $\text{CDCl}_3$ )  $\delta$  177.12, 138.49, 135.56, 134.14, 132.76, 126.99, 125.01, 123.67, 101.99, 36.79, 35.93, 24.52, 22.97.

GC-MS (EI, 70ev):  $m/z$  (%) = 295 ( $\text{M}^+$ ,  $^{81}\text{Br}$ , 98), 293 ( $\text{M}^+$ ,  $^{79}\text{Br}$ , 100), 280 (85), 265 (45), 250 (60), 224 (26), 198 (26), 145 (75), 130 (71), 115 (2), 83 (57), 70 (63).

### 6-(4-Bromo-2-methylphenyl)-3,3-dimethyl-3,4-dihydropyridin-2(1H)-one

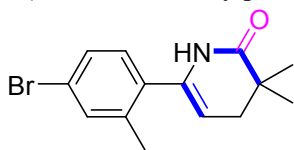

33.0 mg, white solid, yield: 56%.

$^1\text{H NMR}$  (300 MHz, Chloroform-*d*)  $\delta$  7.43 – 7.33 (m, 2H), 7.08 (dd,  $J$  = 8.7, 0.7 Hz, 1H), 6.65 (br.s, 1H), 5.03 (td,  $J$  = 4.5, 1.8 Hz, 1H), 2.33 (d,  $J$  = 4.5 Hz, 2H), 2.30 (dt,  $J$  = 0.4 Hz, 3H), 1.27 (s, 6H).

$^{13}\text{C NMR}$  (75 MHz,  $\text{CDCl}_3$ )  $\delta$  176.30, 137.28, 135.31, 134.98, 132.27, 131.75, 131.69, 119.42, 104.06, 36.60, 35.90, 24.57, 19.38.

GC-MS (EI, 70ev):  $m/z$  (%) = 295 ( $\text{M}^+$ ,  $^{81}\text{Br}$ , 98), 293 ( $\text{M}^+$ ,  $^{79}\text{Br}$ , 100), 278 (60), 252 (34), 224 (26), 211 (38), 145 (55), 130 (71), 115 (31), 83 (50), 70 (57).

### 3,3-Dimethyl-6-(naphthalen-1-yl)-3,4-dihydropyridin-2(1H)-one

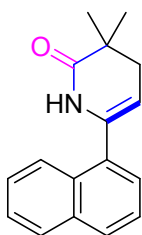

$^1\text{H NMR}$  (300 MHz, Chloroform-*d*)  $\delta$  8.11 – 8.01 (m, 1H), 7.92 – 7.81 (m, 2H), 7.57 – 7.44 (m, 4H), 6.91 (br.s, 1H), 5.25 (td,  $J$  = 4.5, 1.8 Hz, 1H), 2.43 (d,  $J$  = 4.5 Hz, 2H), 1.35 (s, 6H).

$^{13}\text{C NMR}$  (75 MHz,  $\text{CDCl}_3$ )  $\delta$  176.36, 135.69, 133.75, 133.47, 130.88, 129.29, 128.58, 126.71, 126.57, 126.20, 125.29, 124.85, 104.55, 36.74, 36.14, 24.71.

20.1 mg, white solid, yield: 40%.

GC-MS (EI, 70ev):  $m/z$  (%) = 251 ( $\text{M}^+$ , 100), 236 (26), 223 (10), 208 (13), 180 (71), 154 (25), 127 (27).

### 3,3-Dimethyl-6-(thiophen-3-yl)-3,4-dihydropyridin-2(1H)-one

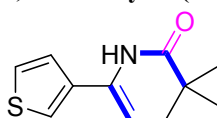

29.4 mg, white solid, yield: 81%.

$^1\text{H NMR}$  (300 MHz,  $\text{CDCl}_3$ )  $\delta$  7.38 (br.s, 1H), 7.34 (dd,  $J$  = 5.1, 2.9 Hz, 1H), 7.29 (dd,  $J$  = 2.9, 1.4 Hz, 1H), 7.20 (dd,  $J$  = 5.0, 1.4 Hz, 1H), 5.42 (td,  $J$  = 4.7, 1.8 Hz, 1H), 2.32 (d,  $J$  = 4.7 Hz, 2H), 1.23 (s, 6H).

$^{13}\text{C NMR}$  (75 MHz,  $\text{CDCl}_3$ )  $\delta$  177.14, 136.41, 132.03, 126.77, 124.72, 119.31, 101.02, 37.00, 35.76, 24.62.

GC-MS (EI, 70ev):  $m/z$  (%) = 207 ( $\text{M}^+$ , 100), 192 (80), 179 (36), 164 (52), 138(82), 125 (13), 110 (37), 83 (32), 70 (32).

### 3-Methyl-6-phenyl-3,4-dihydropyridin-2(1H)-one <sup>[3]</sup>

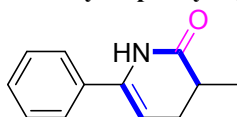

16.8 mg, white solid, yield: 45%.

$^1\text{H NMR}$  (400 MHz,  $\text{CDCl}_3$ )  $\delta$  7.57 – 7.49 (br.s, 1H), 7.45 – 7.30 (m, 5H), 5.44 (ddd,  $J$  = 5.5, 3.7, 1.7 Hz, 1H), 2.66 – 2.47 (m, 2H), 2.32 – 2.18 (m, 1H), 1.27 (d,  $J$  = 6.8 Hz, 3H).

$^{13}\text{C NMR}$  (100 MHz,  $\text{CDCl}_3$ )  $\delta$  174.92, 136.87, 135.02, 128.85, 128.65, 124.84, 102.26, 34.64, 28.89, 15.33.

GC-MS (EI, 70ev):  $m/z$  (%) = 187 ( $\text{M}^+$ , 100), 172 (77), 158 (47), 144 (39), 132 (28), 116 (21), 104 (50), 77 (27).

HRMS (ESI) Calc. for  $\text{C}_{12}\text{H}_{13}\text{NO}$  ( $\text{M}+\text{H}^+$ ): 188.1075; found: 188.1075.



## 4. References

- [1] a) Z. Y. Ma, L. N. Guo, Y. R. Gu, L. Chen, X. H. Duan, *Adv. Synth. Catal.* **2018**, 360, 4341-4347;  
b) W. Shu, C. Nevado, *Angew. Chem., Int. Ed.* **2017**, 56, 1881-1884; c) E. M. Dauncey, S. P. Morcillo, J. J. Douglas, N. S. Sheikh, D. Leonori, *Angew. Chem., Int. Ed.* **2018**, 57, 744-748.
- [2] M. Pawlowski, J. K. Maurin, A. Leniewski, *Heterocycles* **2005**, 65, 9-22.
- [3] C. Chuit, R. Corriu, R. Perz, C. Reye, *Tetrahedron* **1986**, 42, 2293-2301.

## 5. Copy of $^1\text{H}$ and $^{13}\text{C}$ NMR Spectra of Products

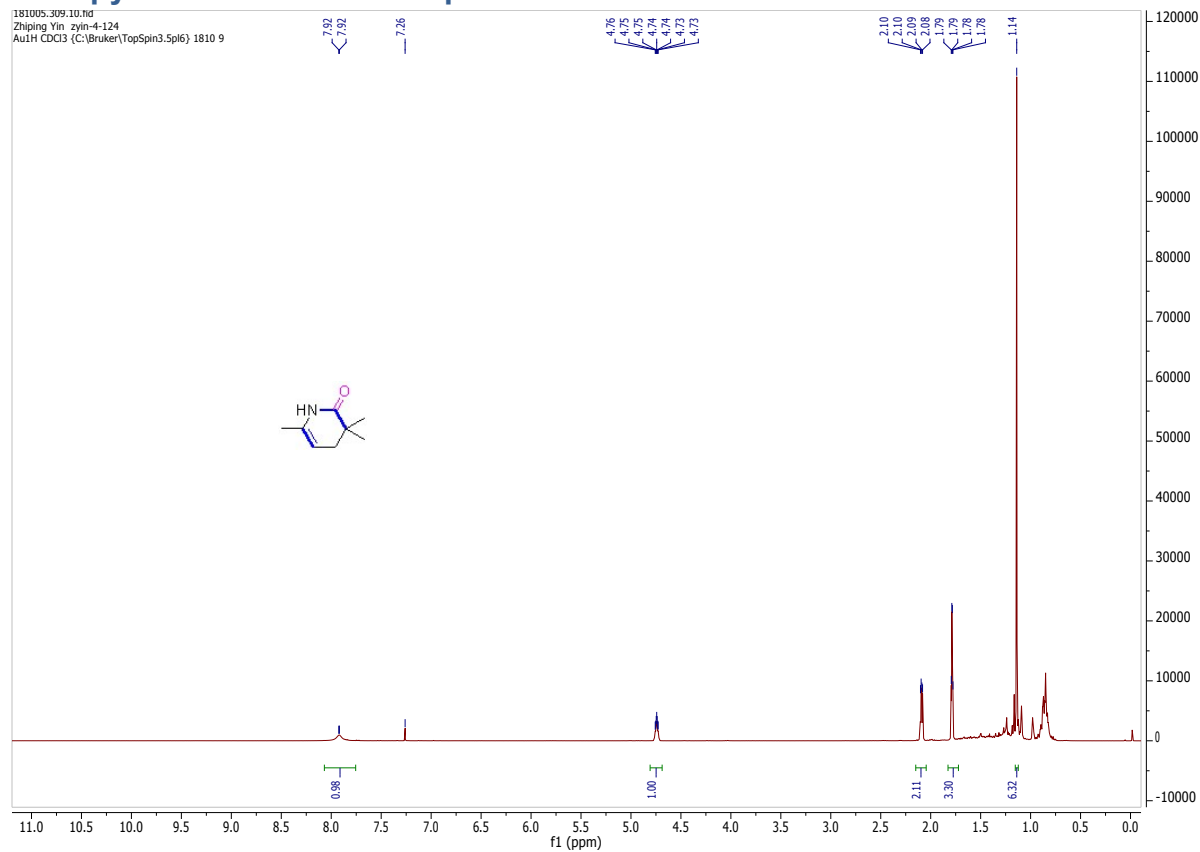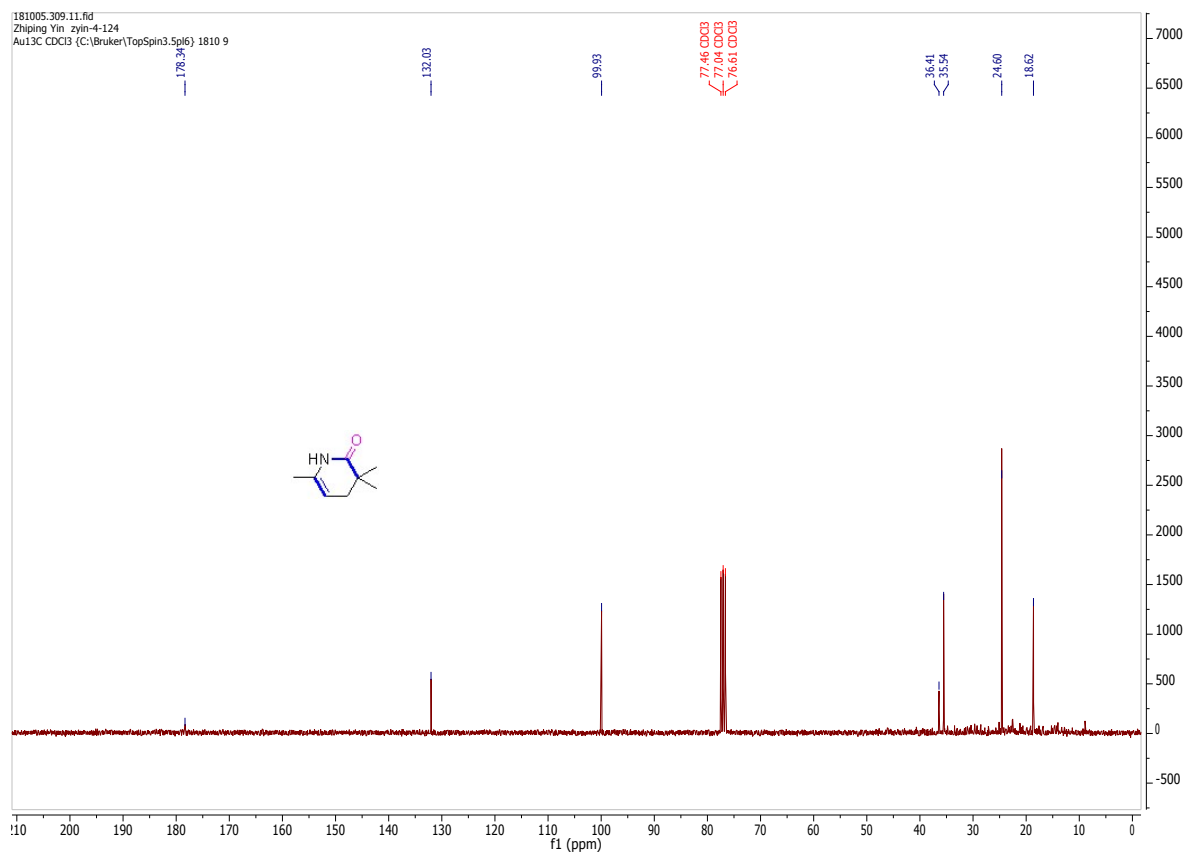

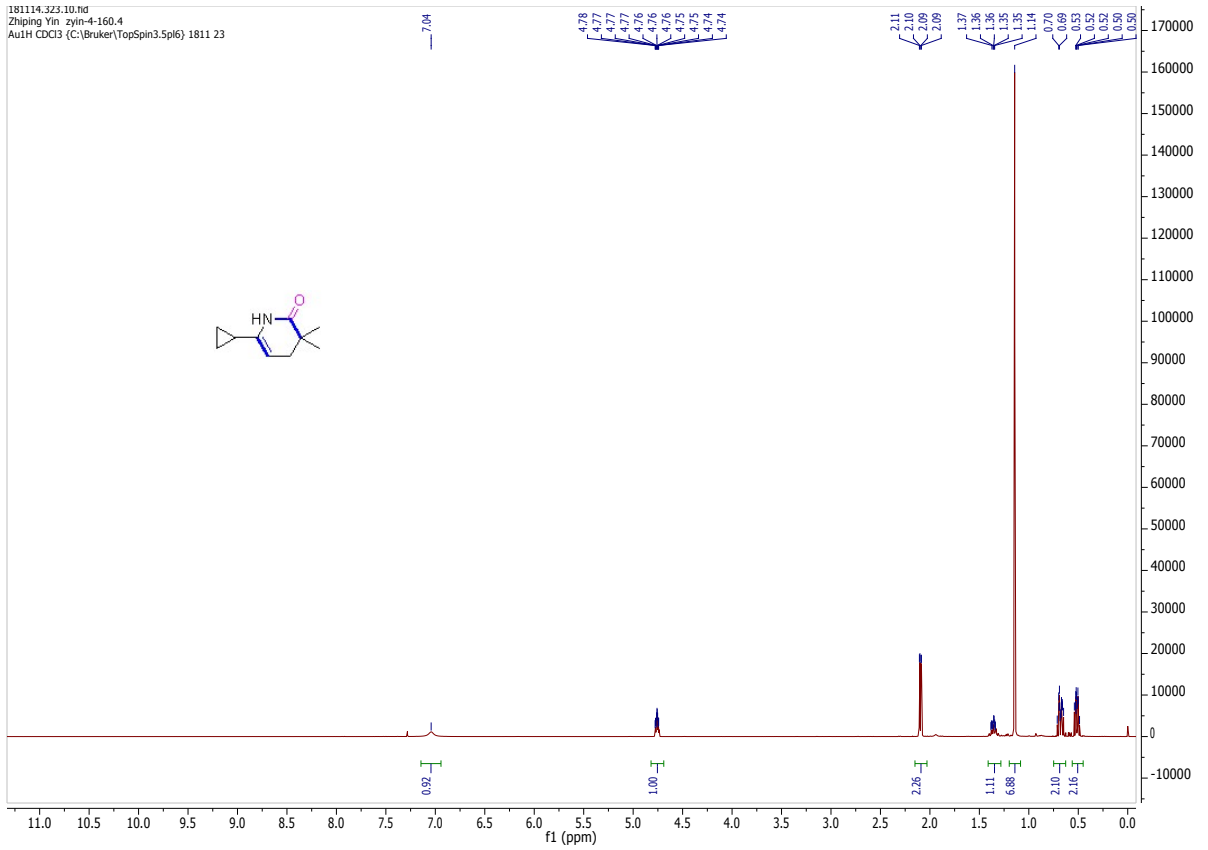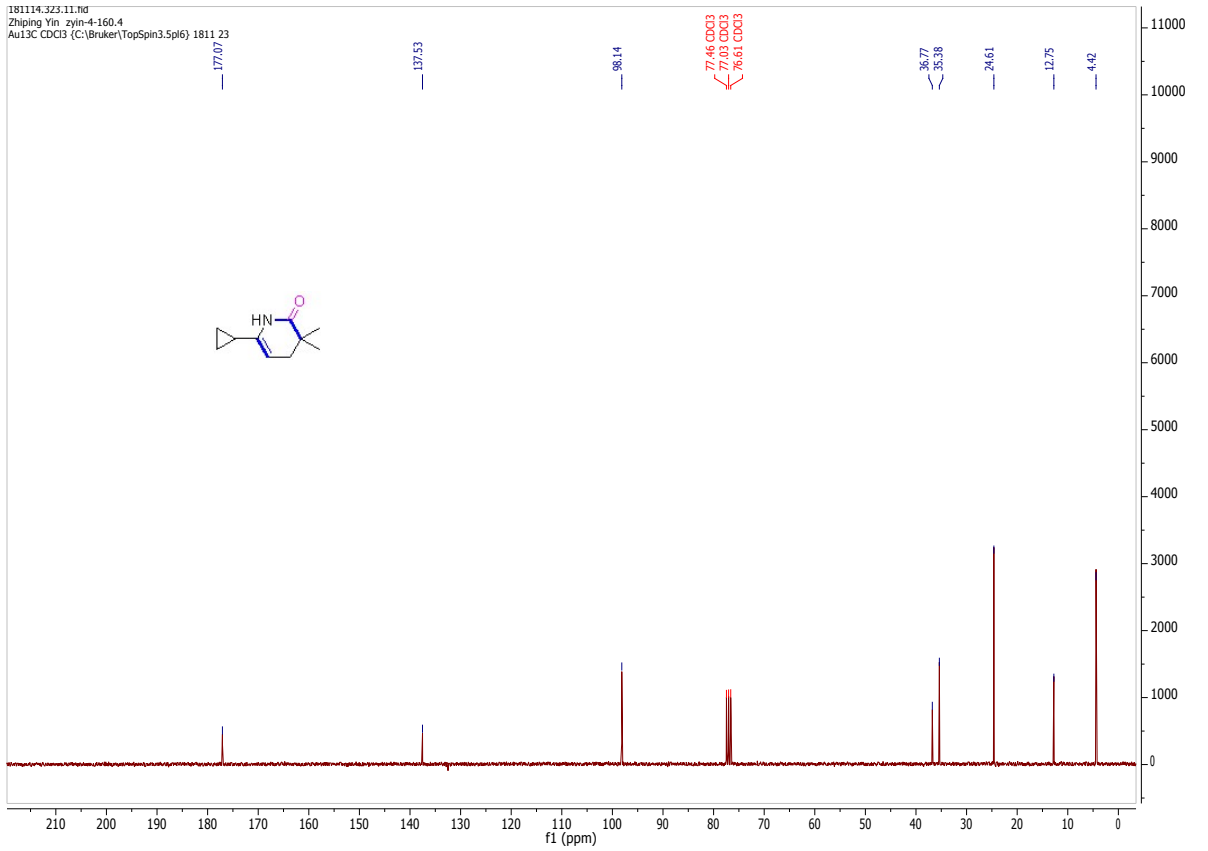

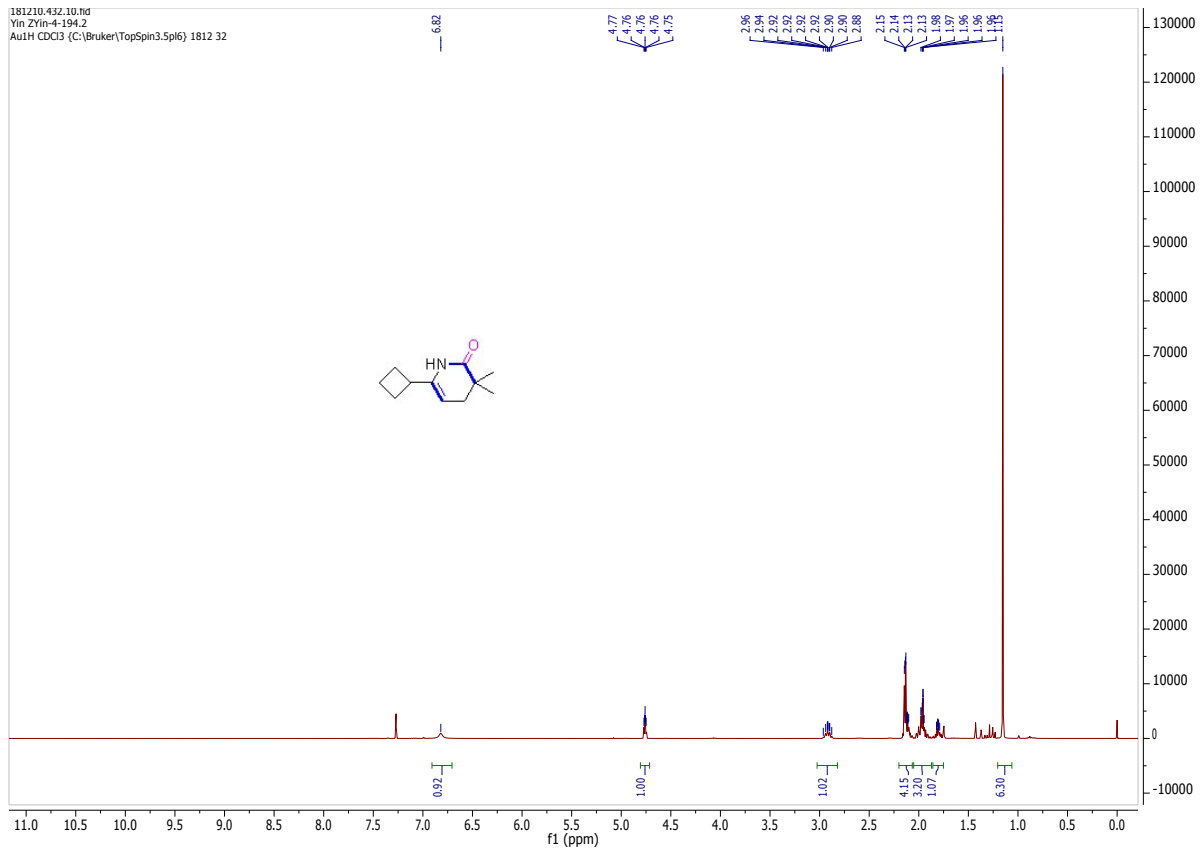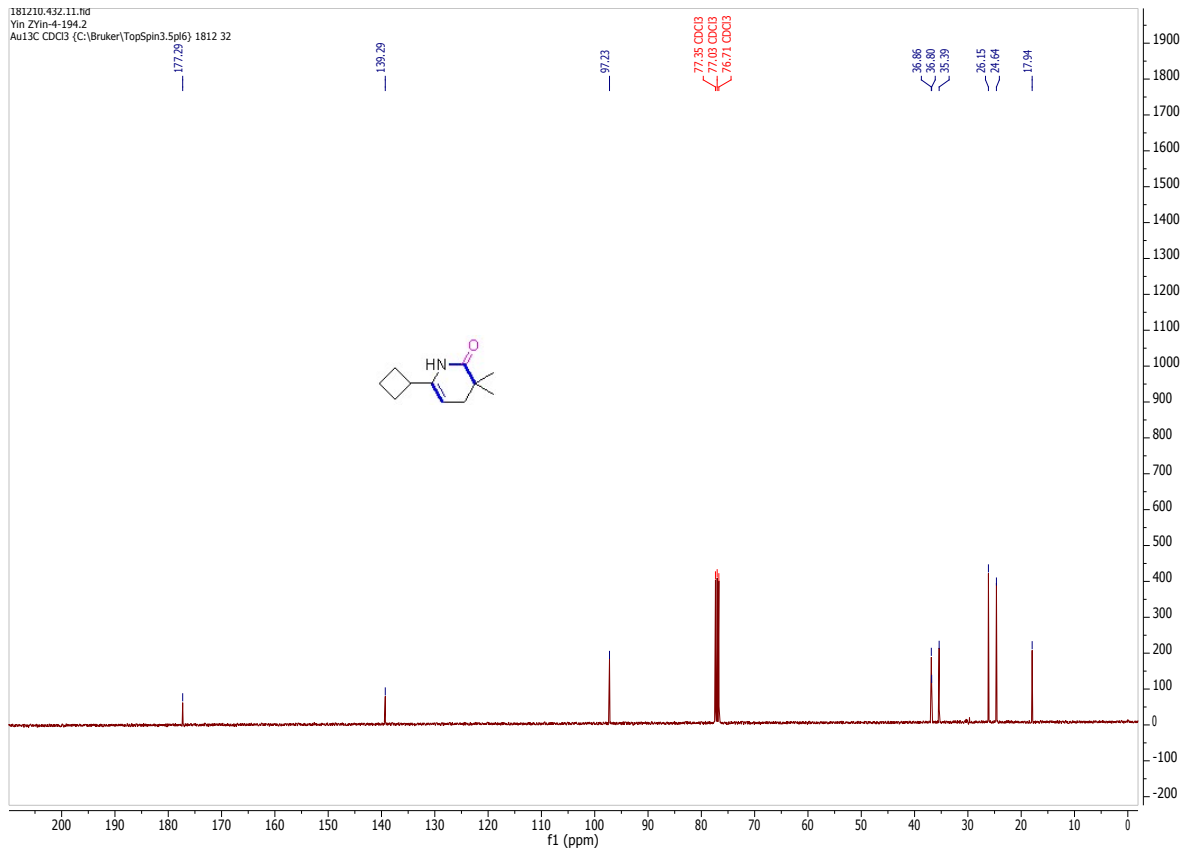

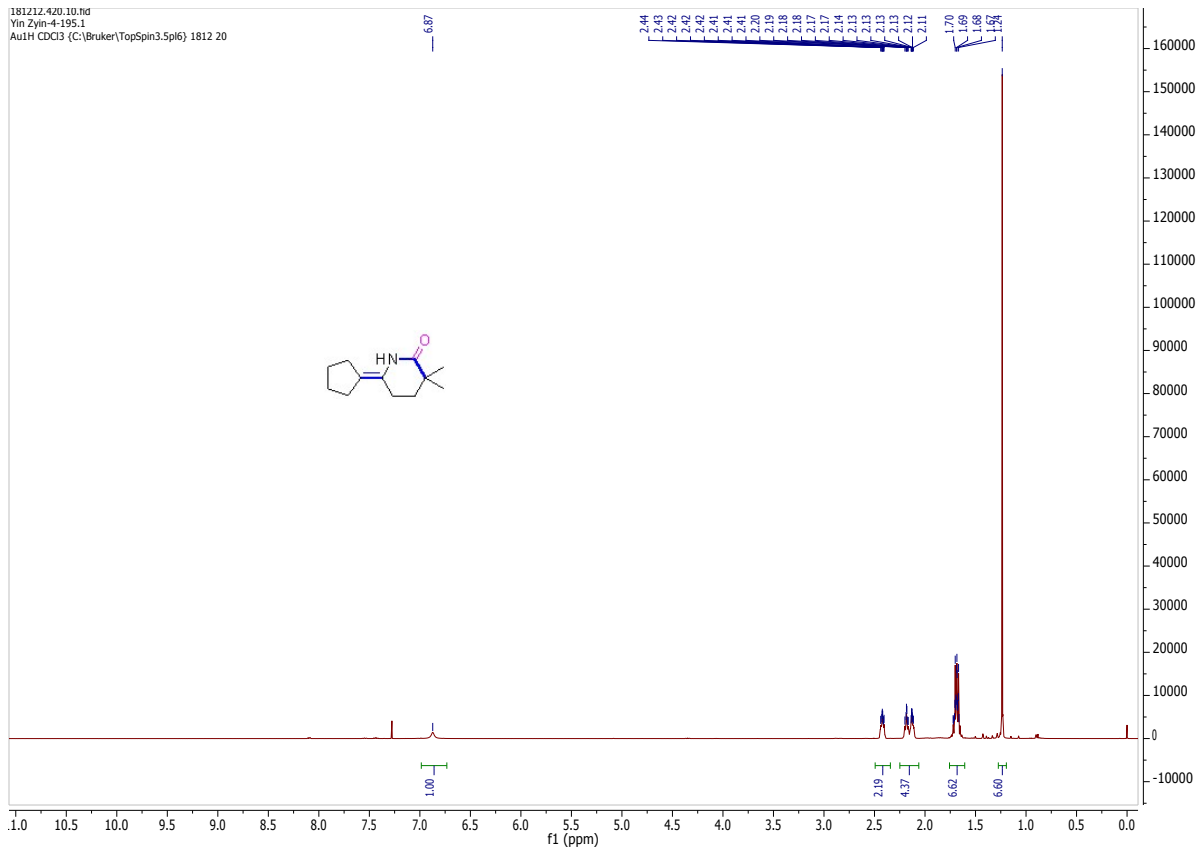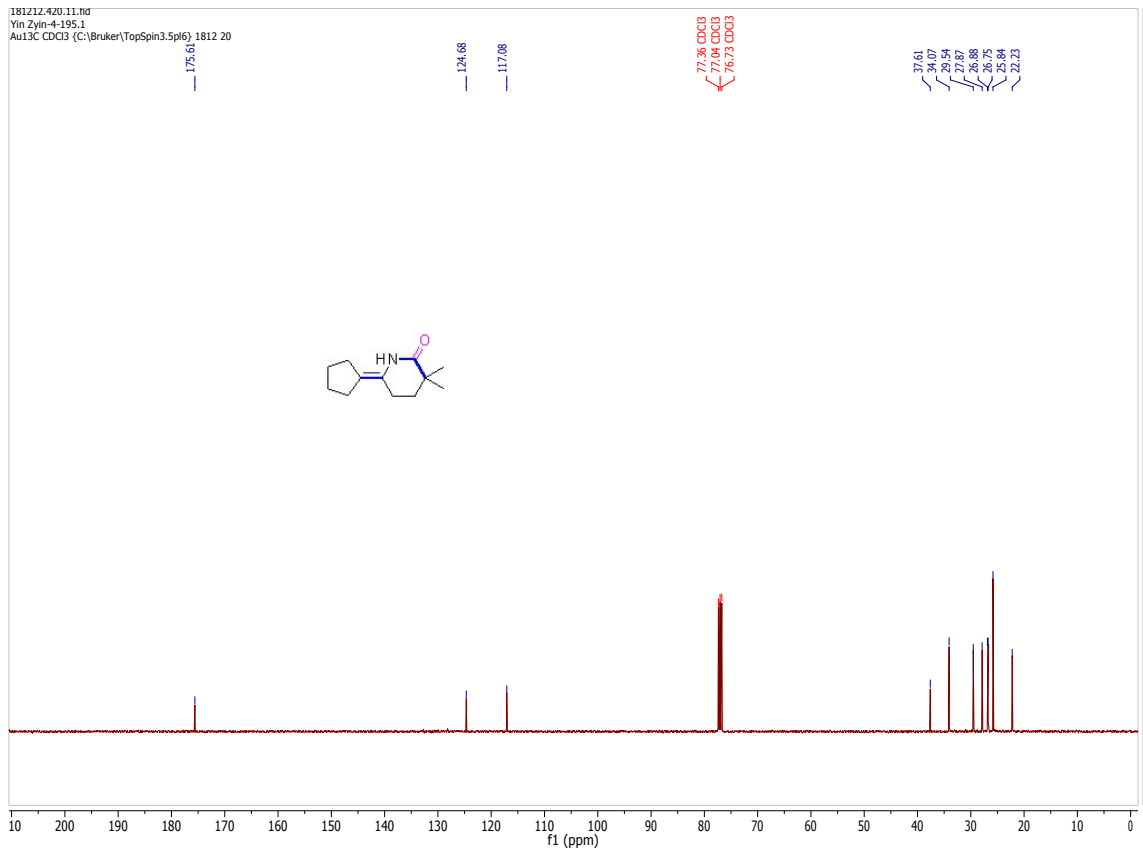

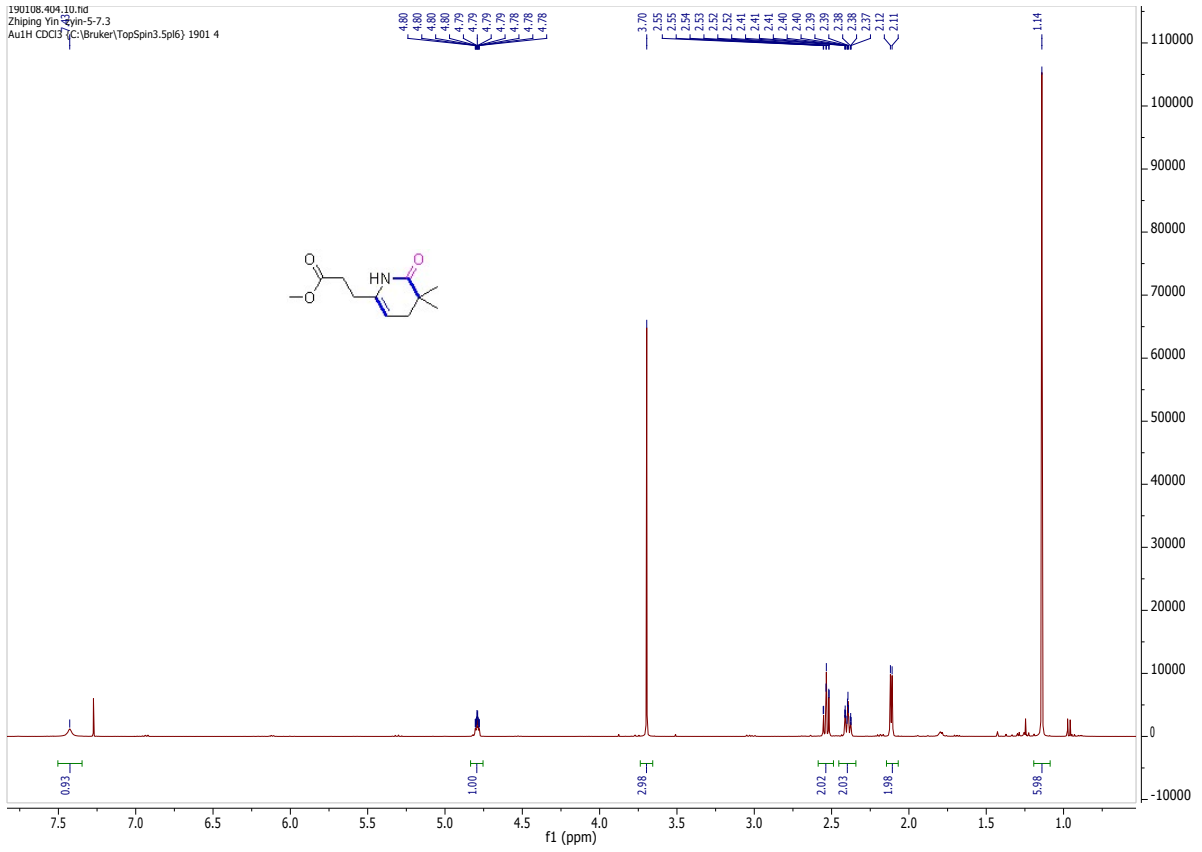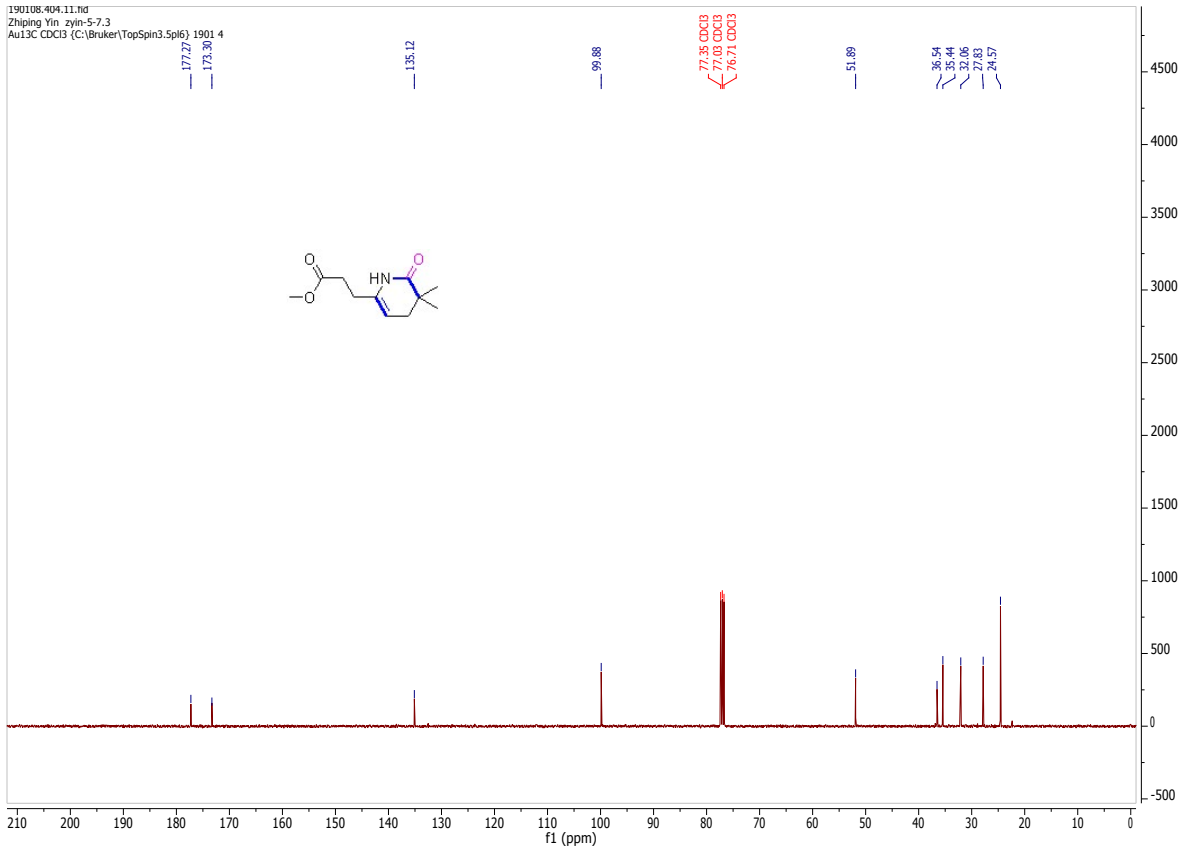

181218-1310.10.hd  
Zhiping Yin zyin-4-200.1  
PROTON CDCl3 (C:\Bruker\TopSpin3.6.0) 1812.10

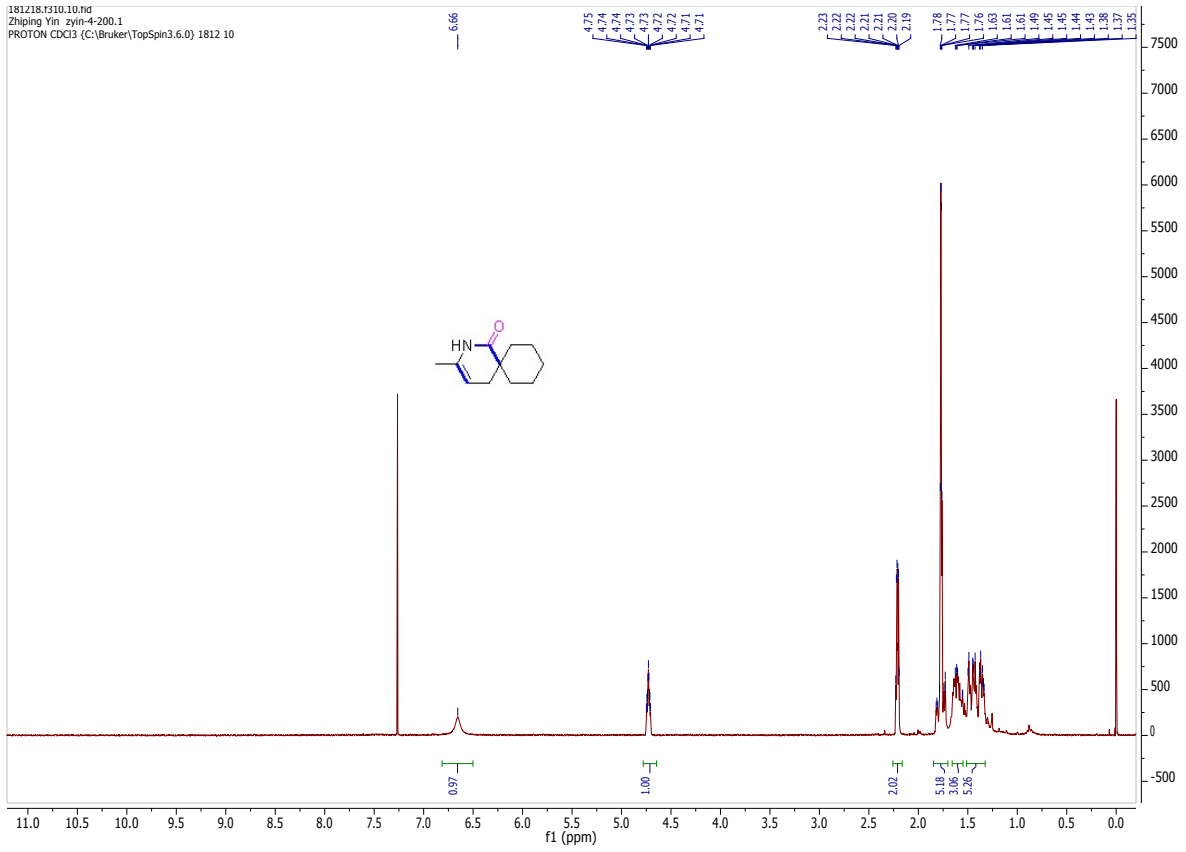

181218-1310.11.hd  
Zhiping Yin zyin-4-200.1  
C13CPD CDCl3 (C:\Bruker\TopSpin3.6.0) 1812.10

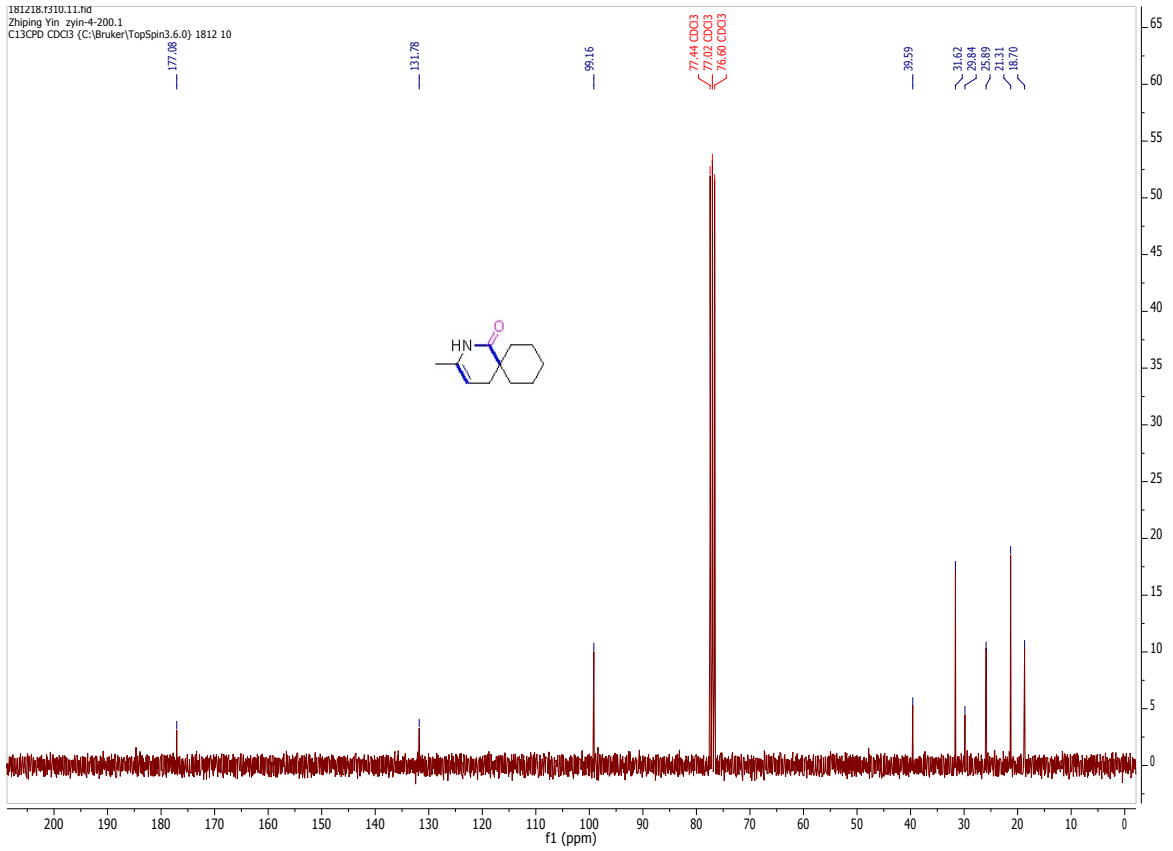

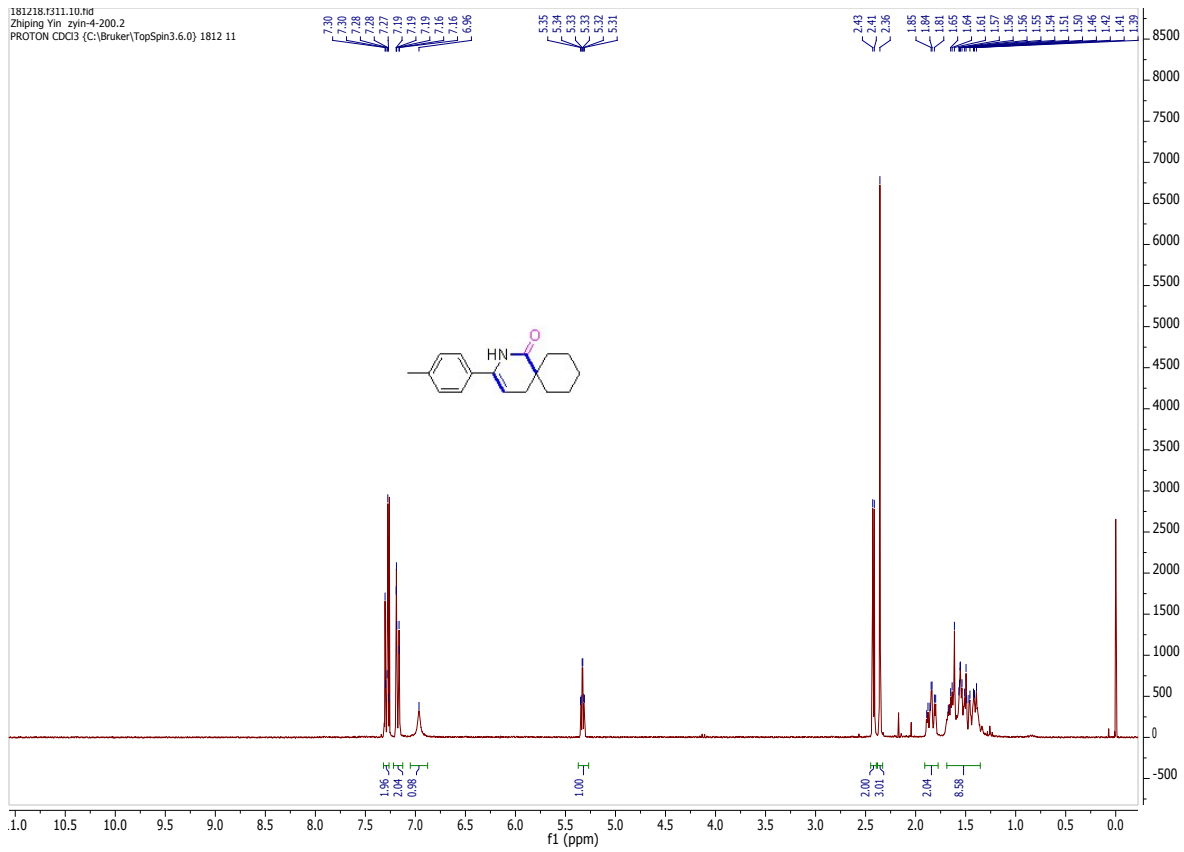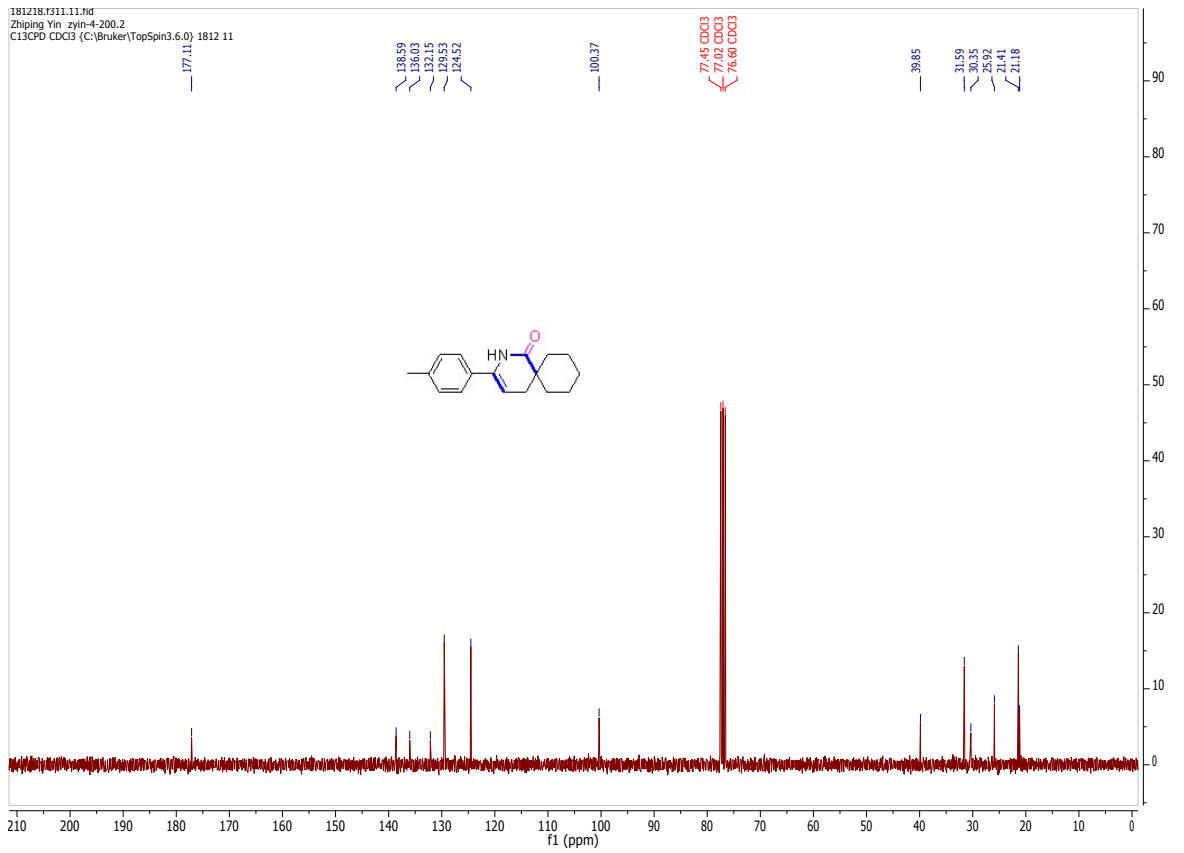



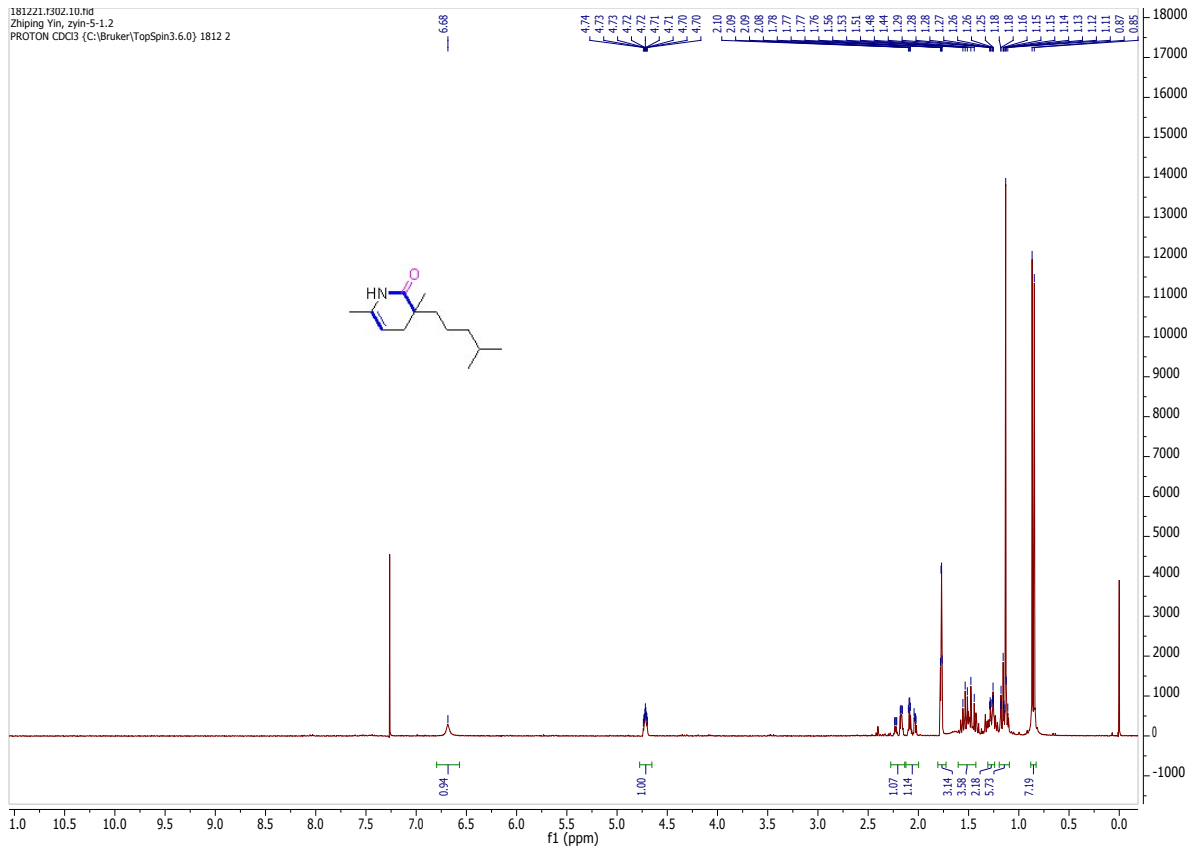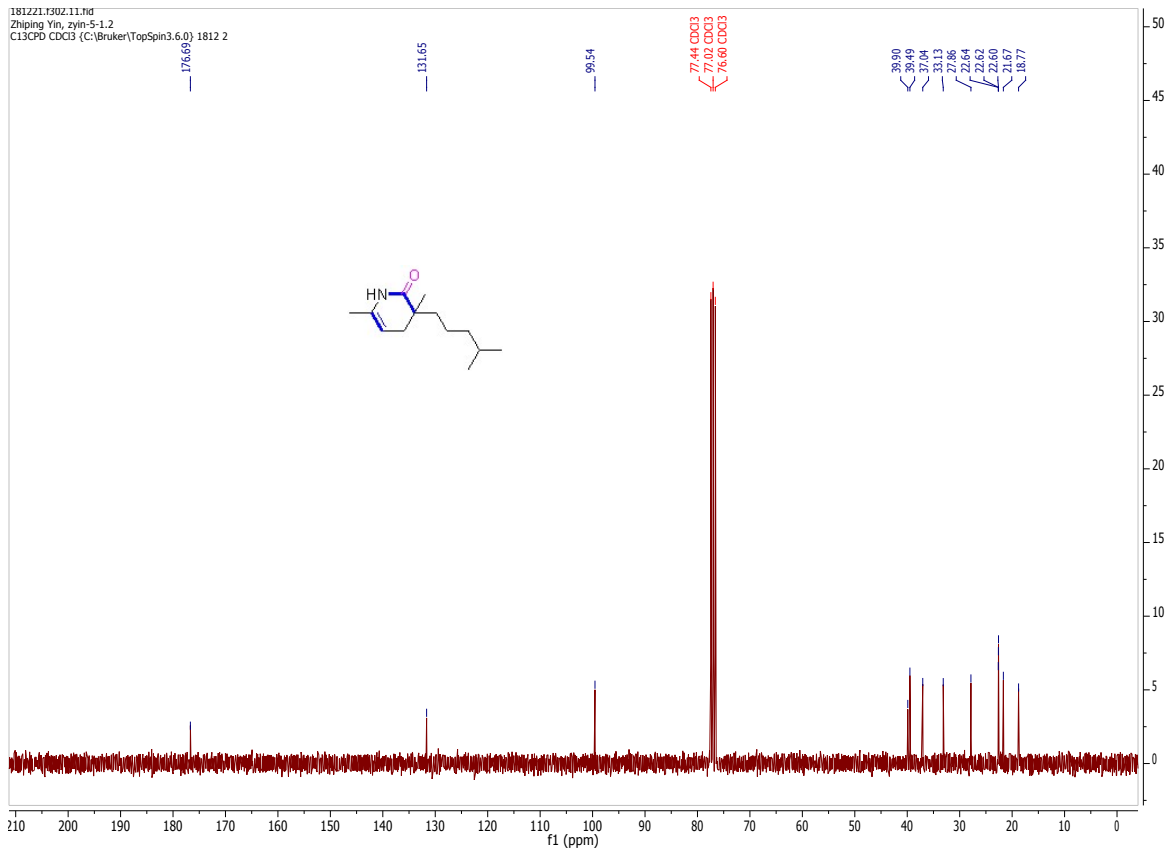

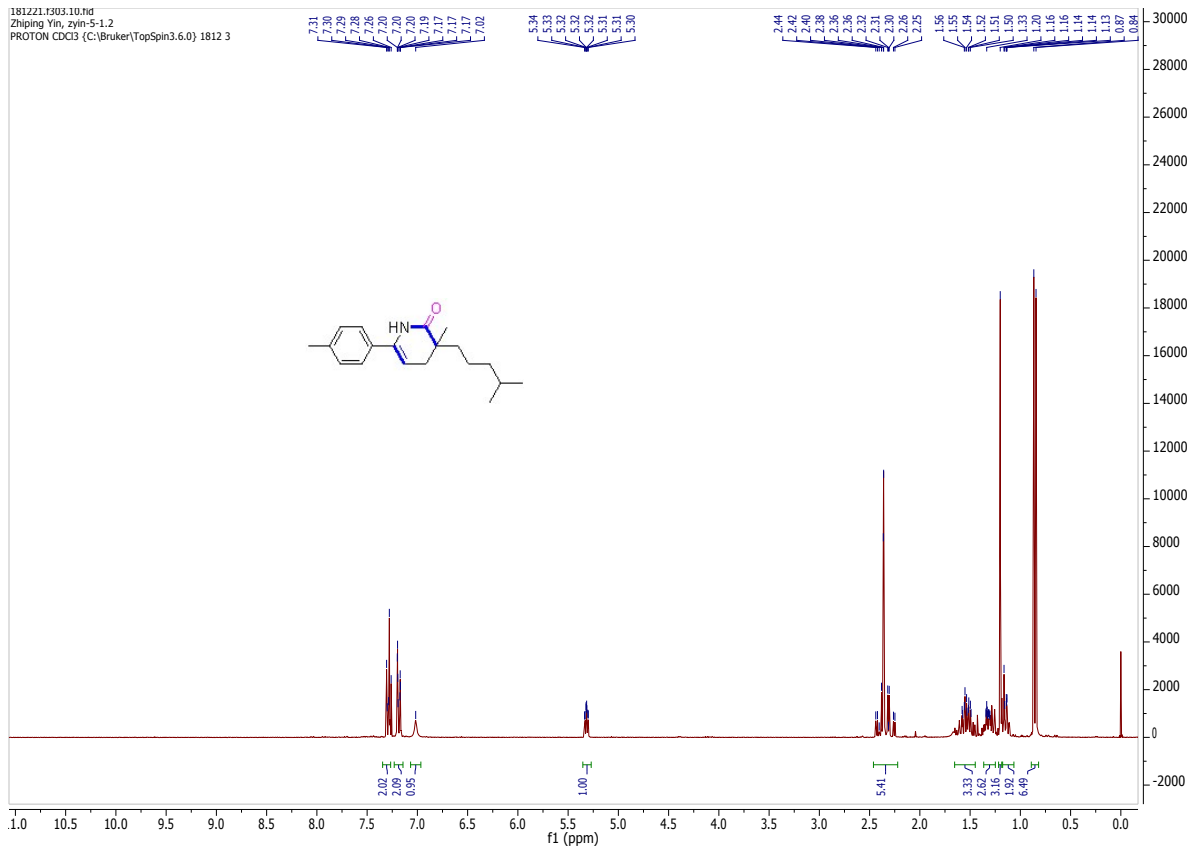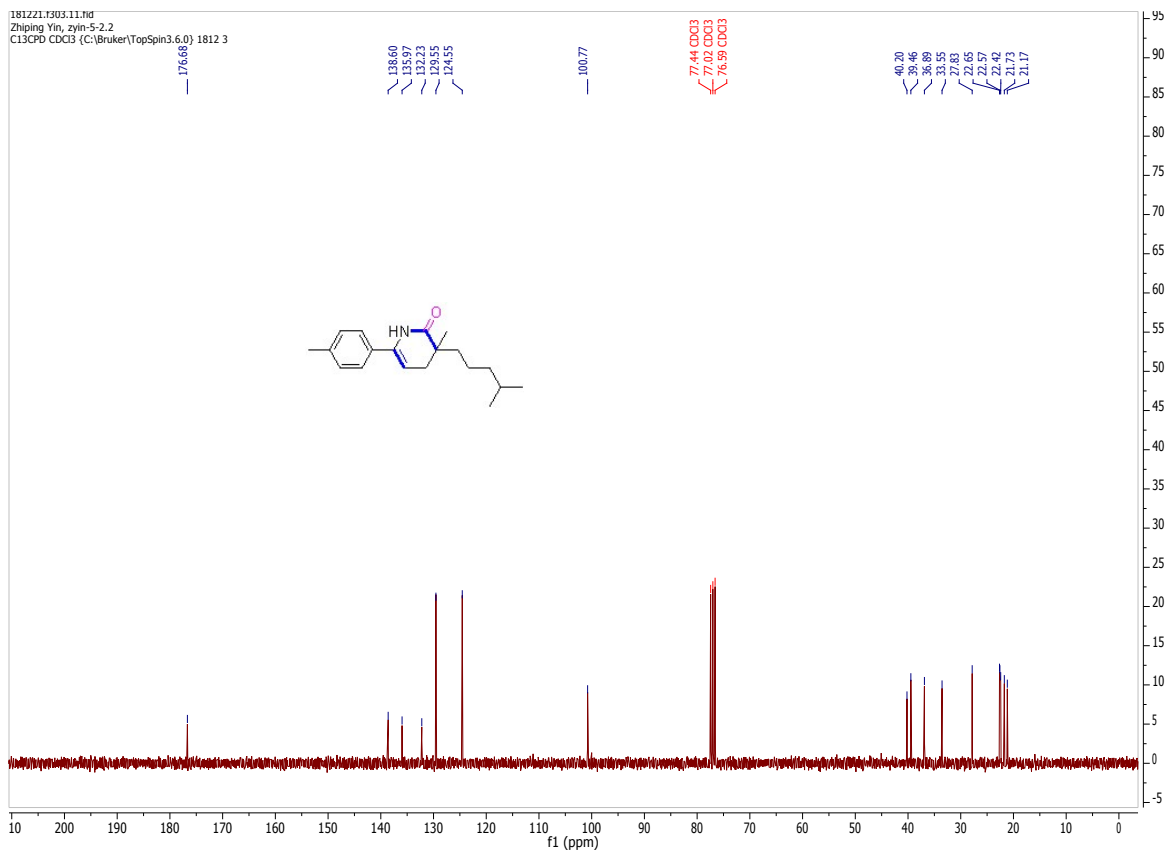

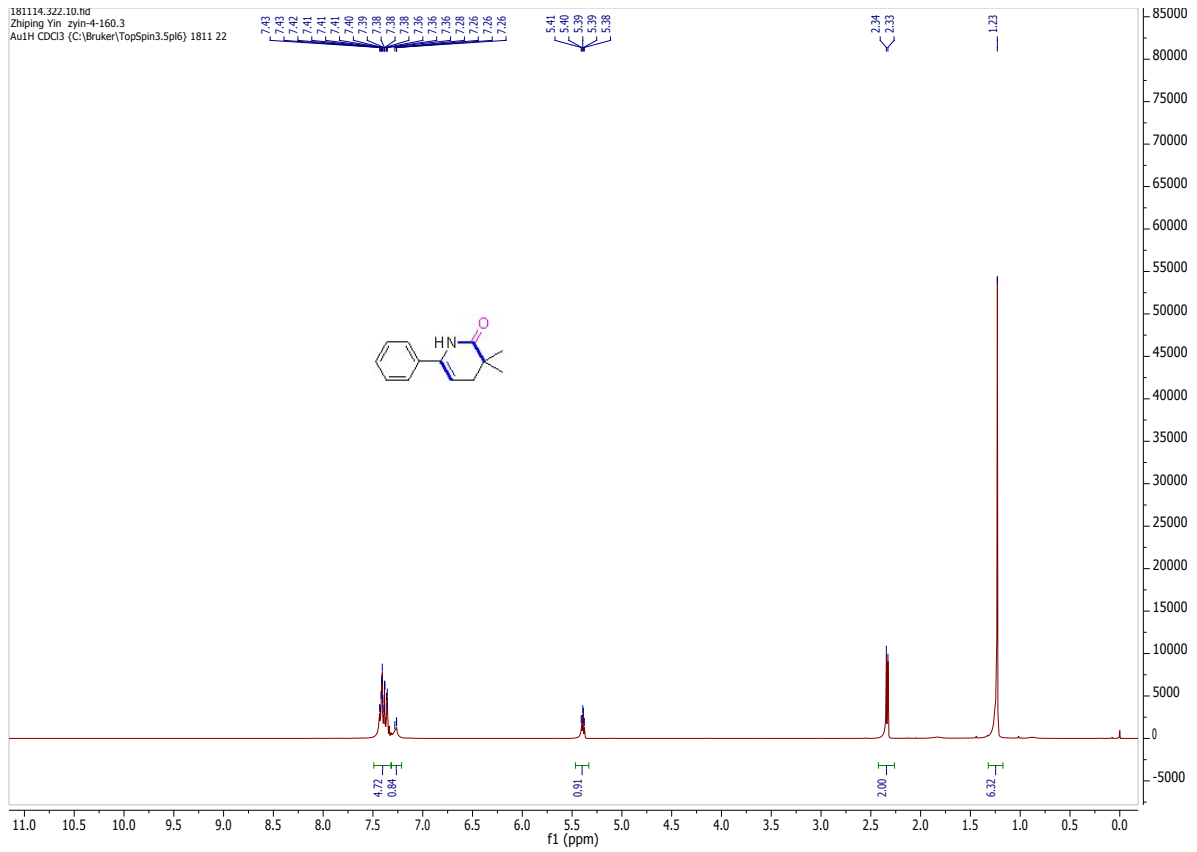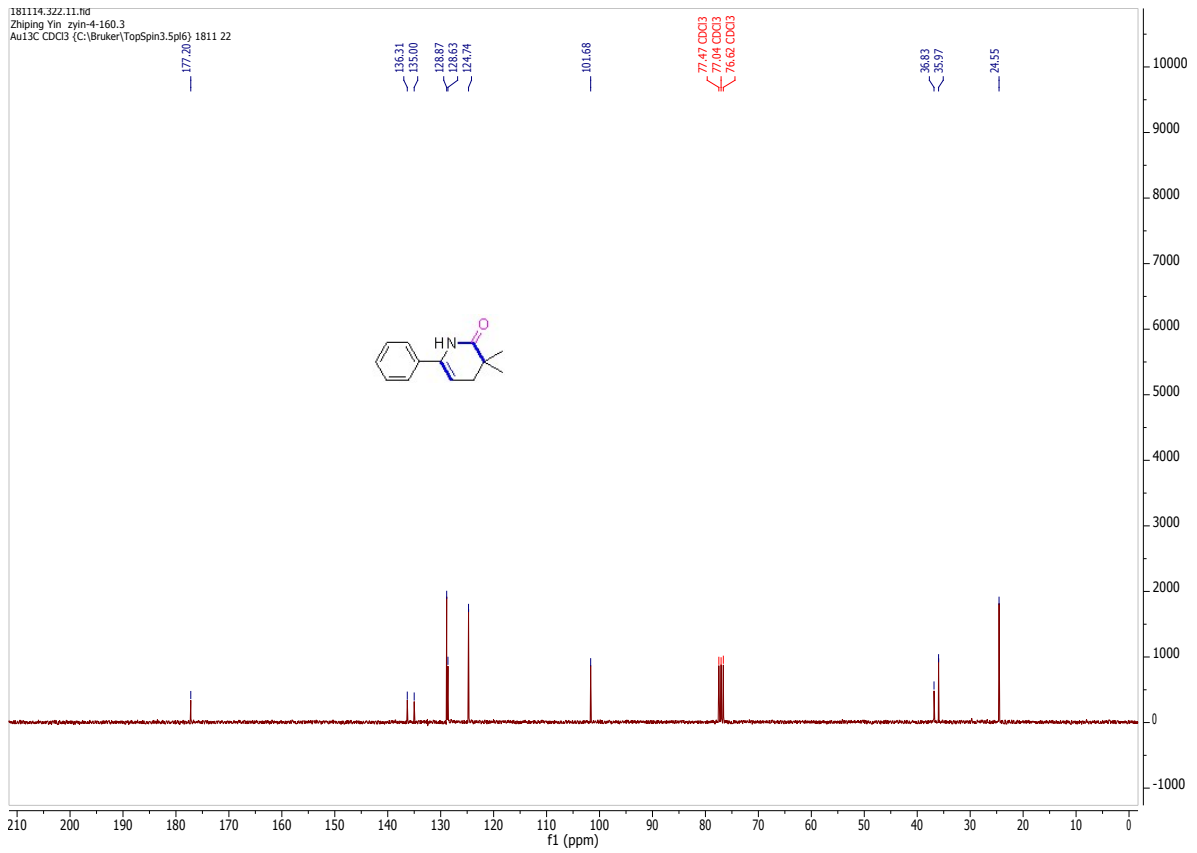

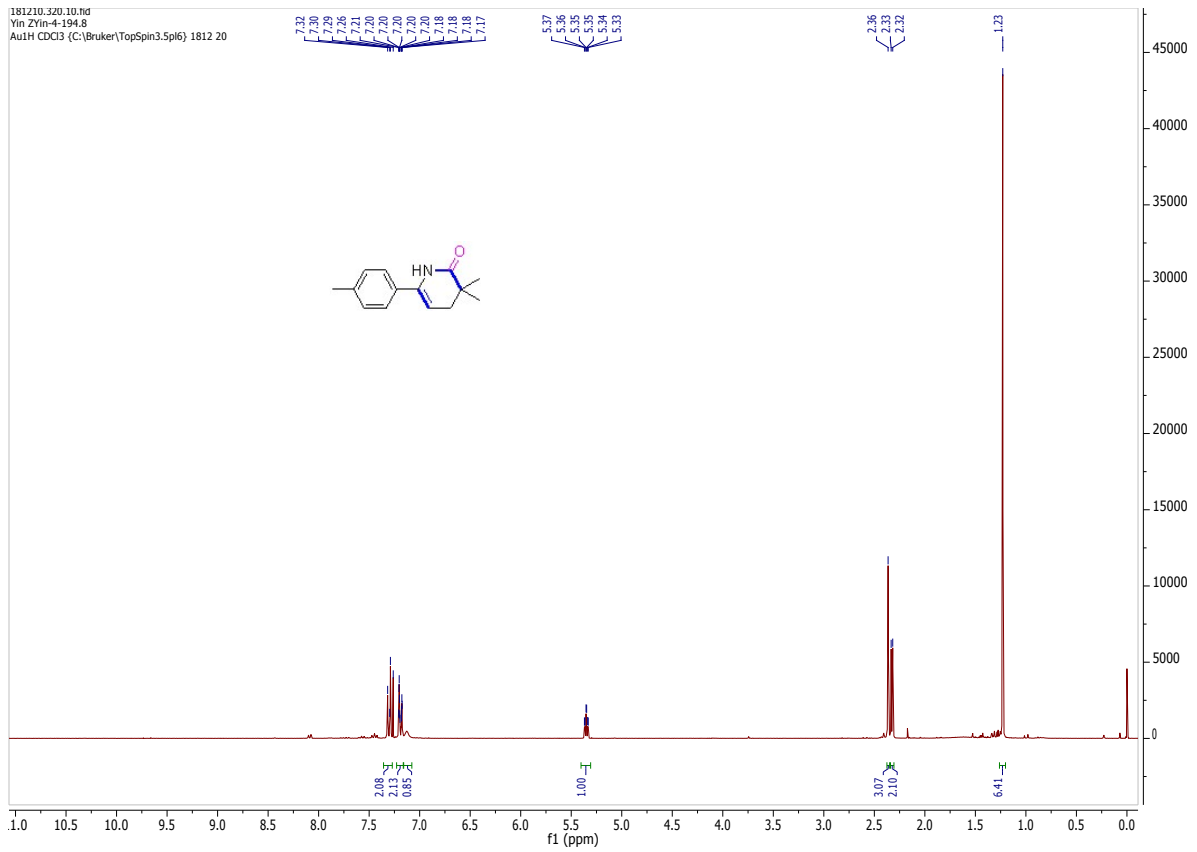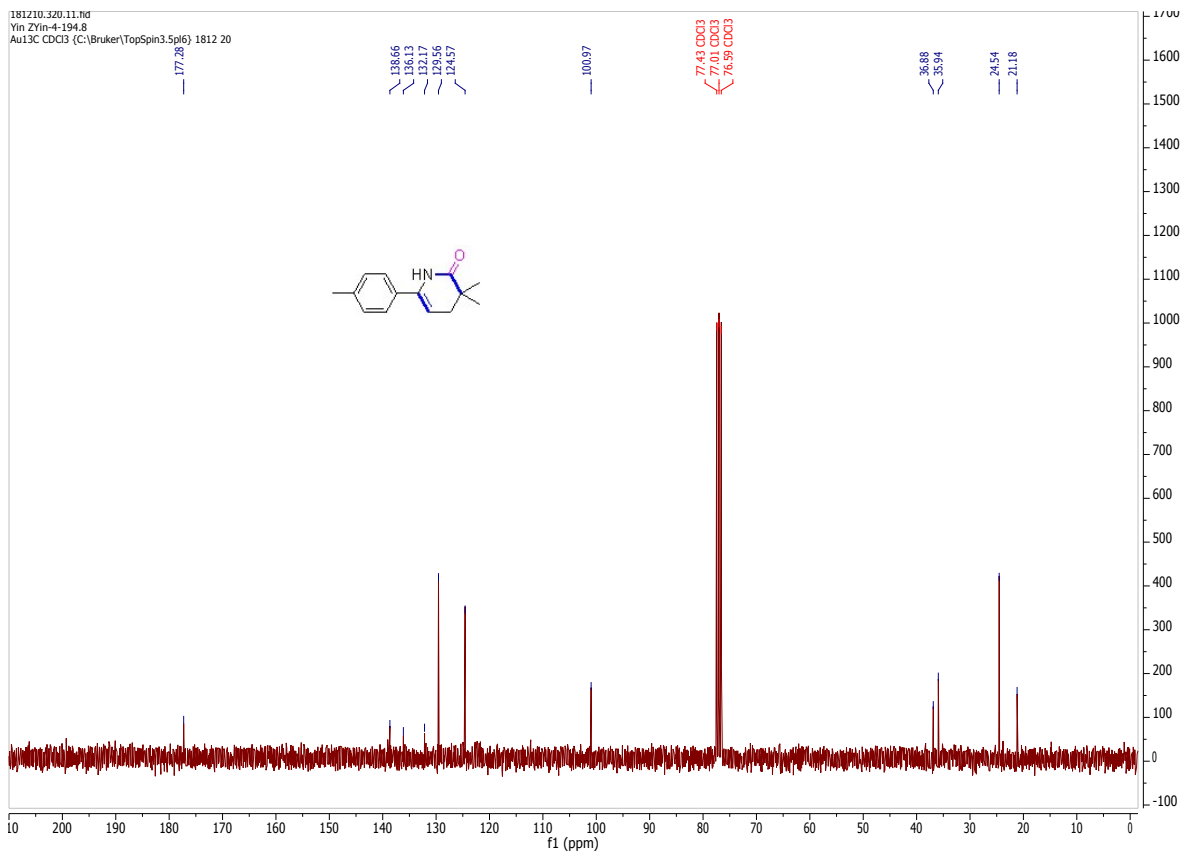

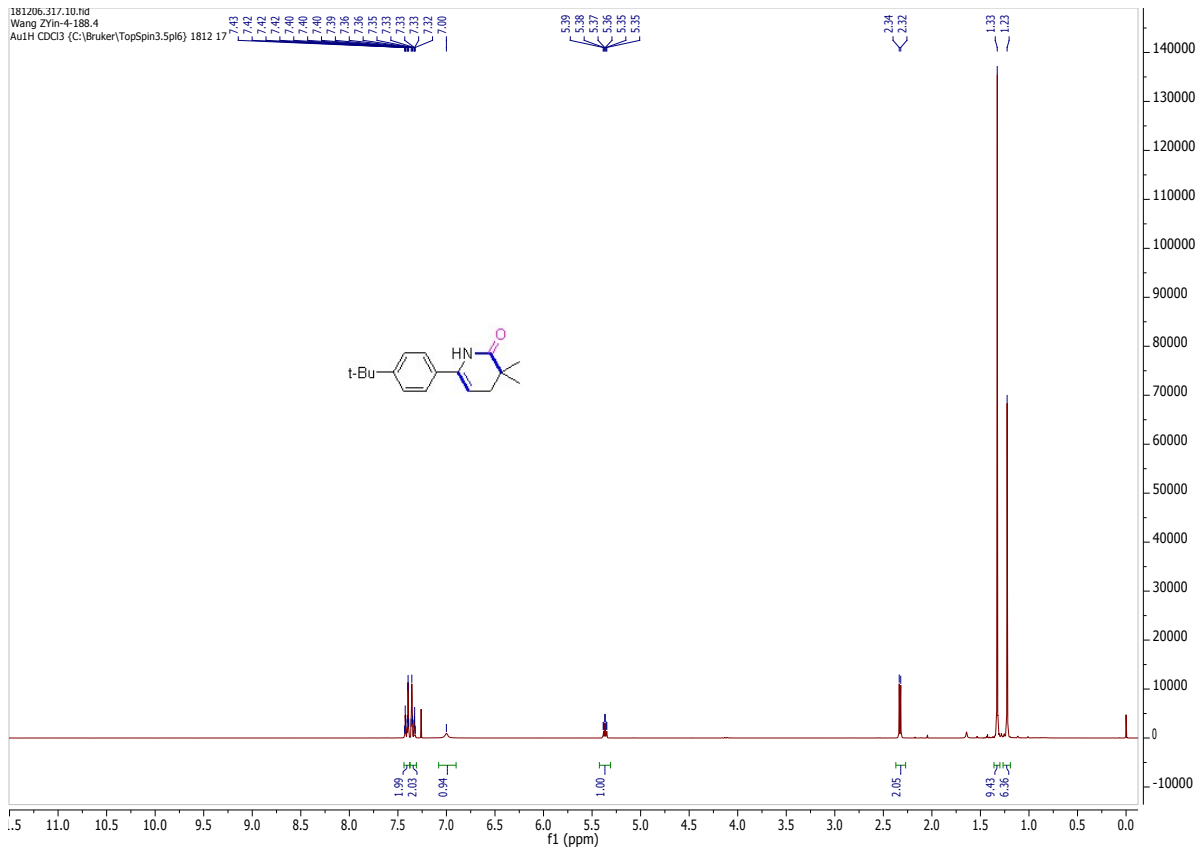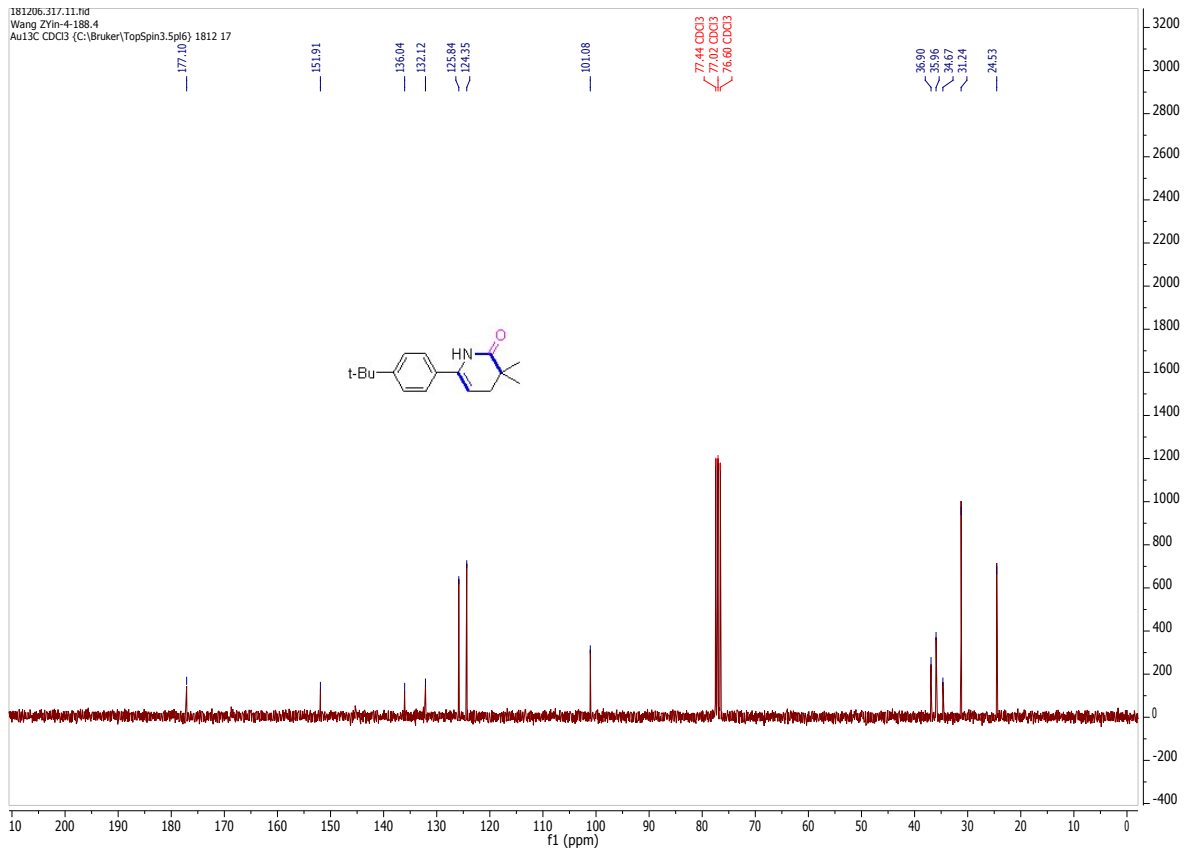

181206.318.10.fid  
Wang ZYin-4-188.5  
Au1H CDCl3 (C:\Bruker\TopSpin3.5\pl6) 1812 18

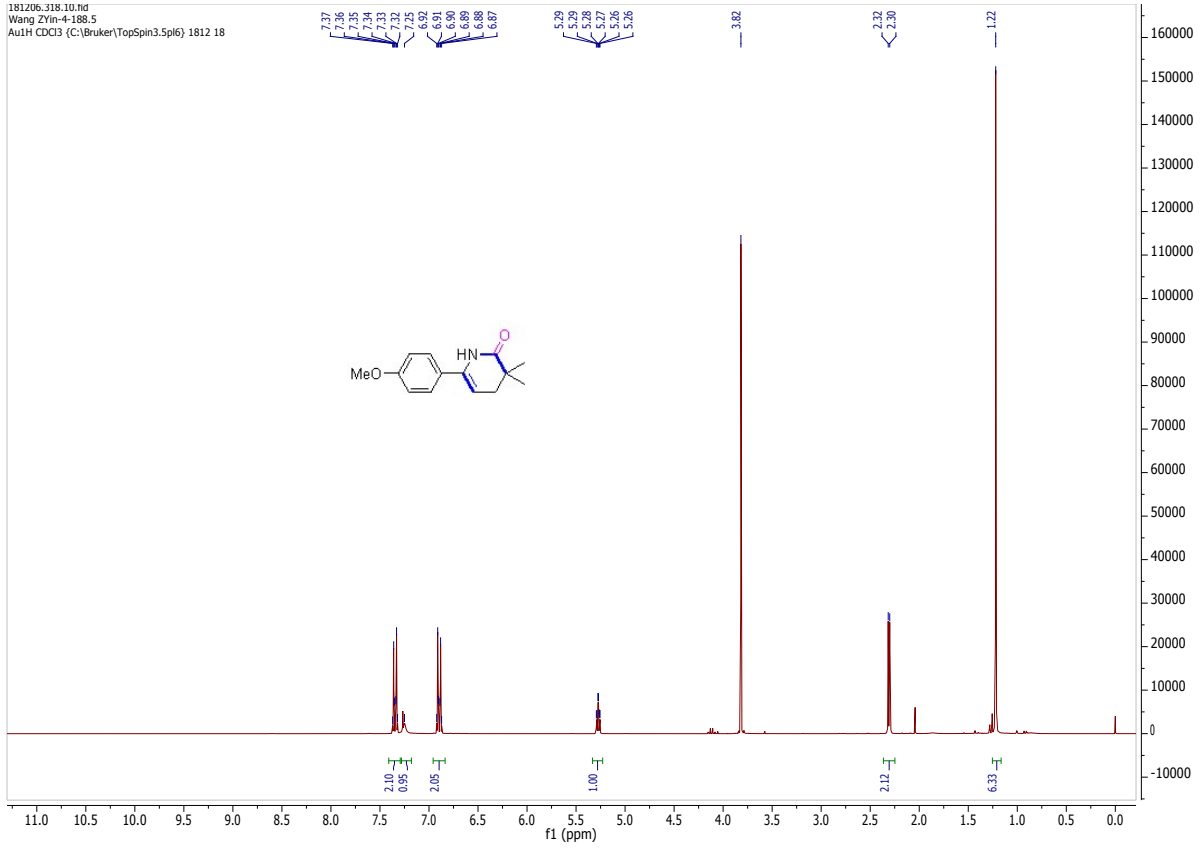

181206.318.11.fid  
Wang ZYin-4-188.5  
Au13C CDCl3 (C:\Bruker\TopSpin3.5\pl6) 1812 18

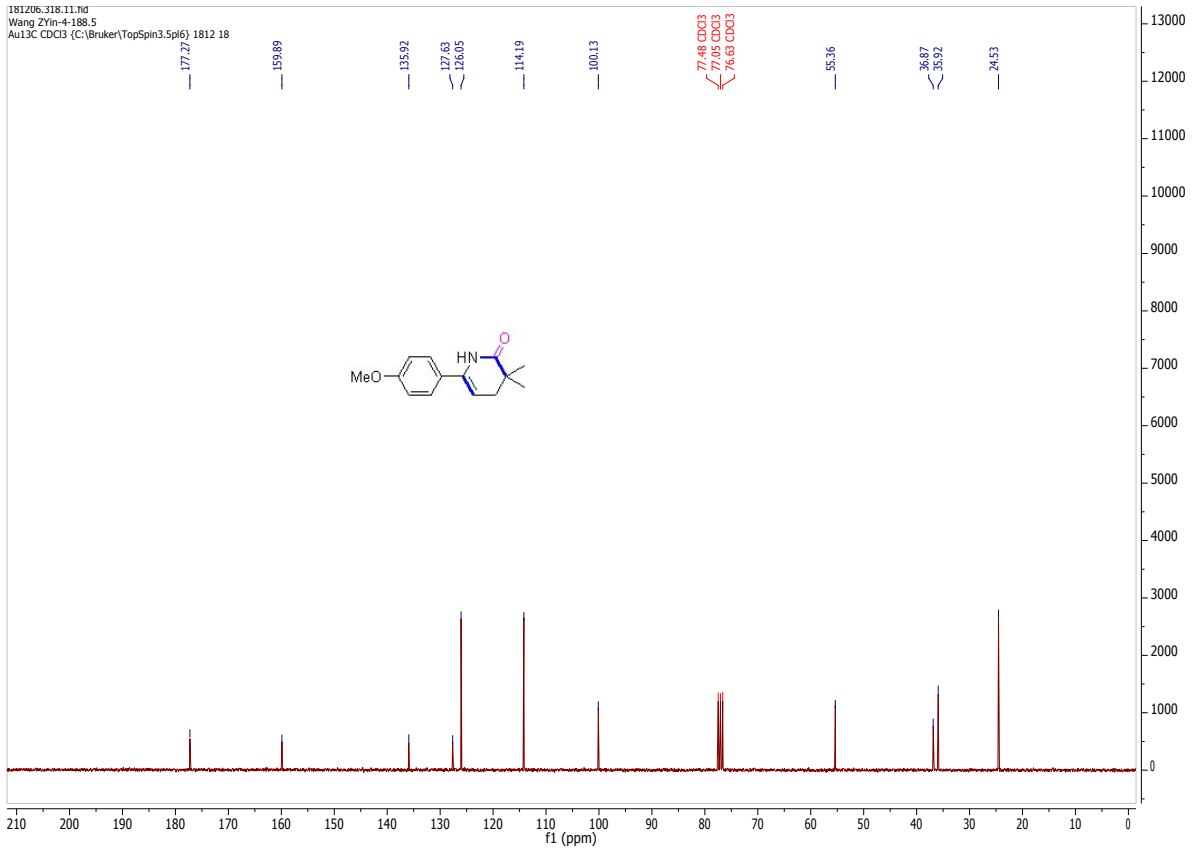

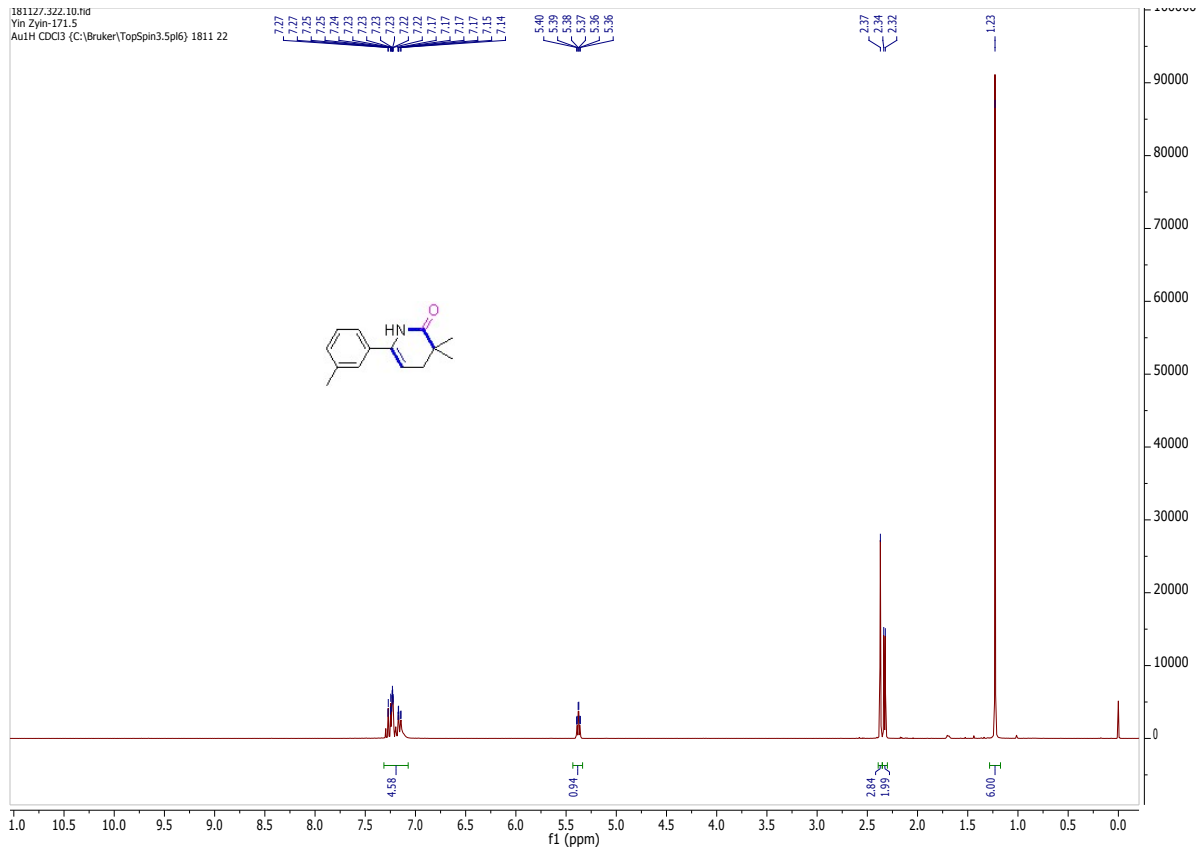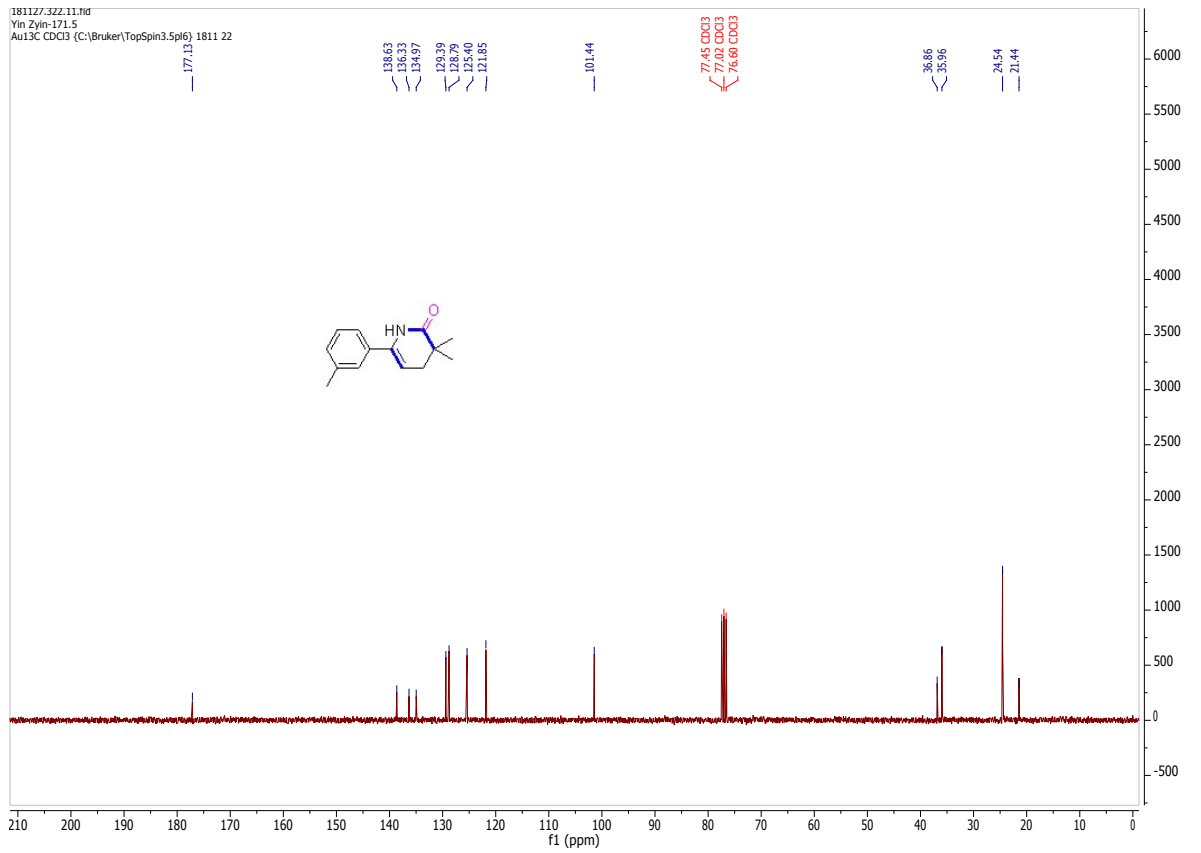

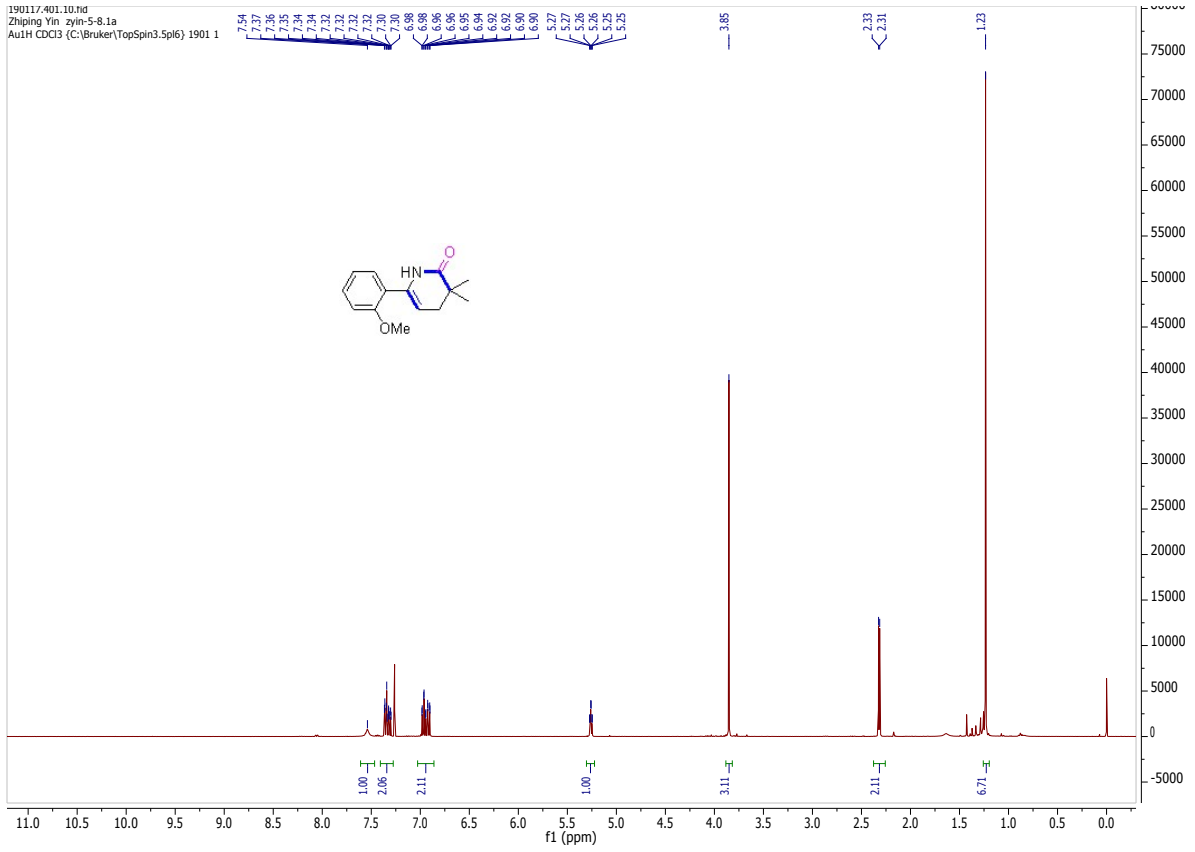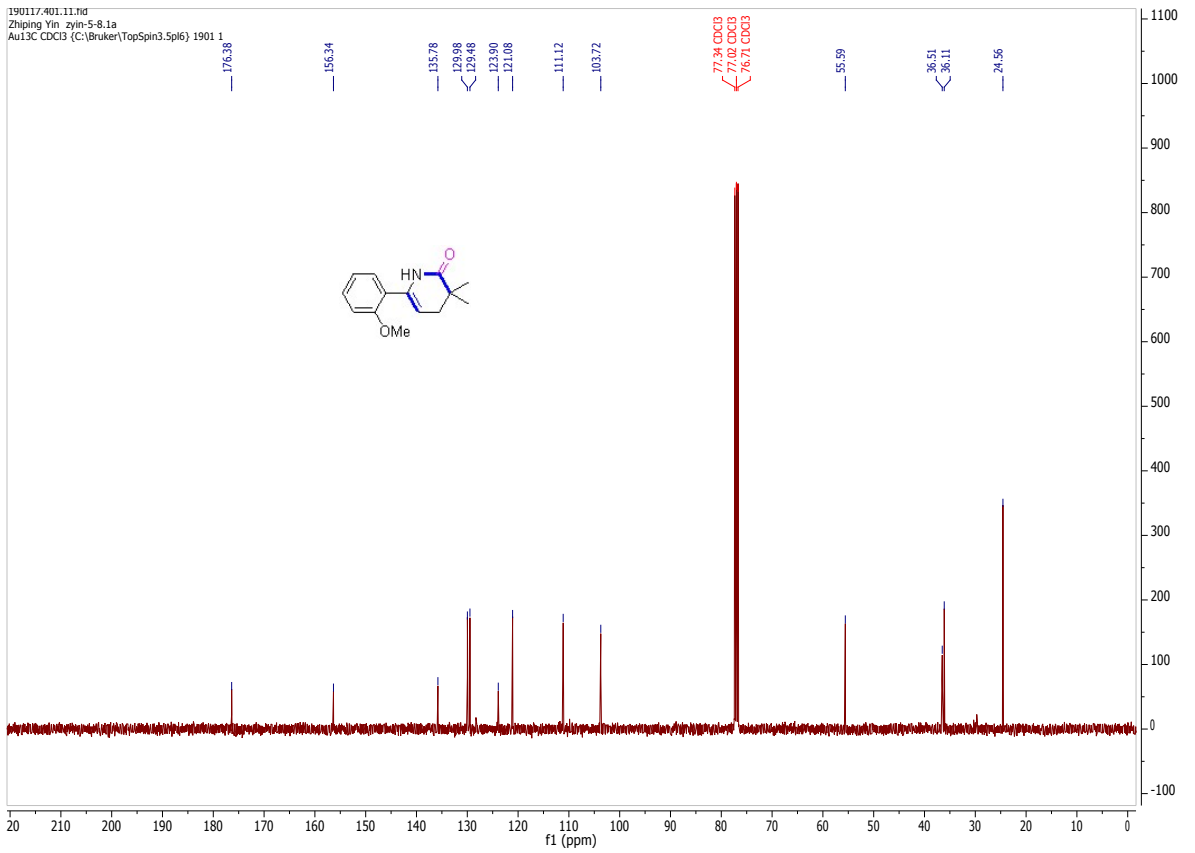



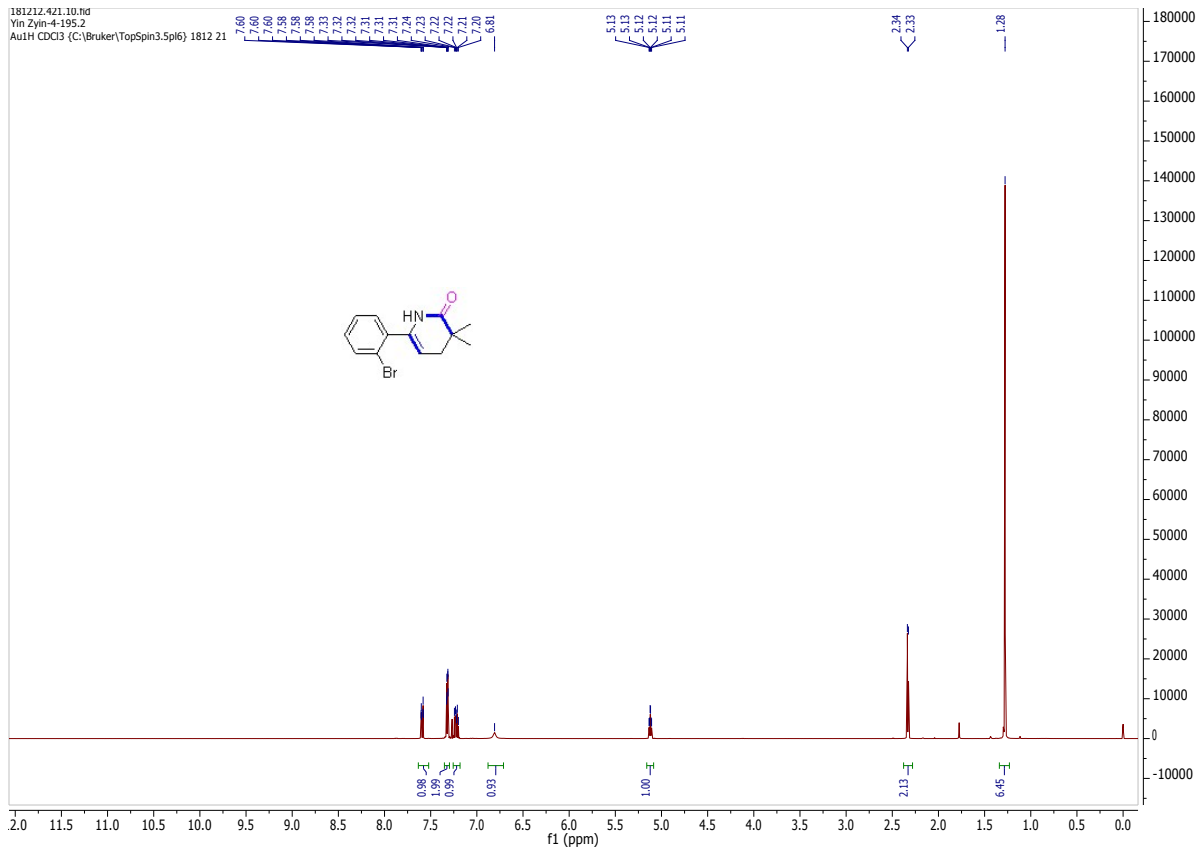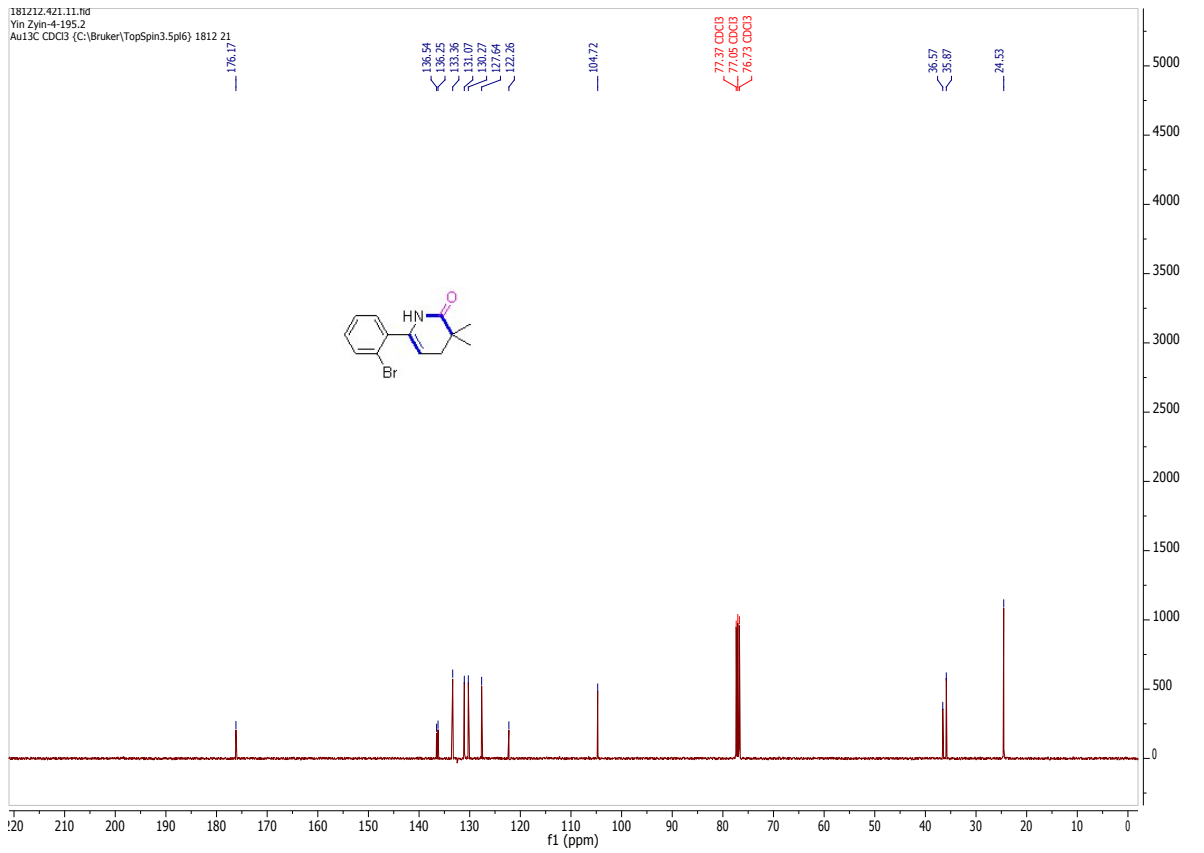

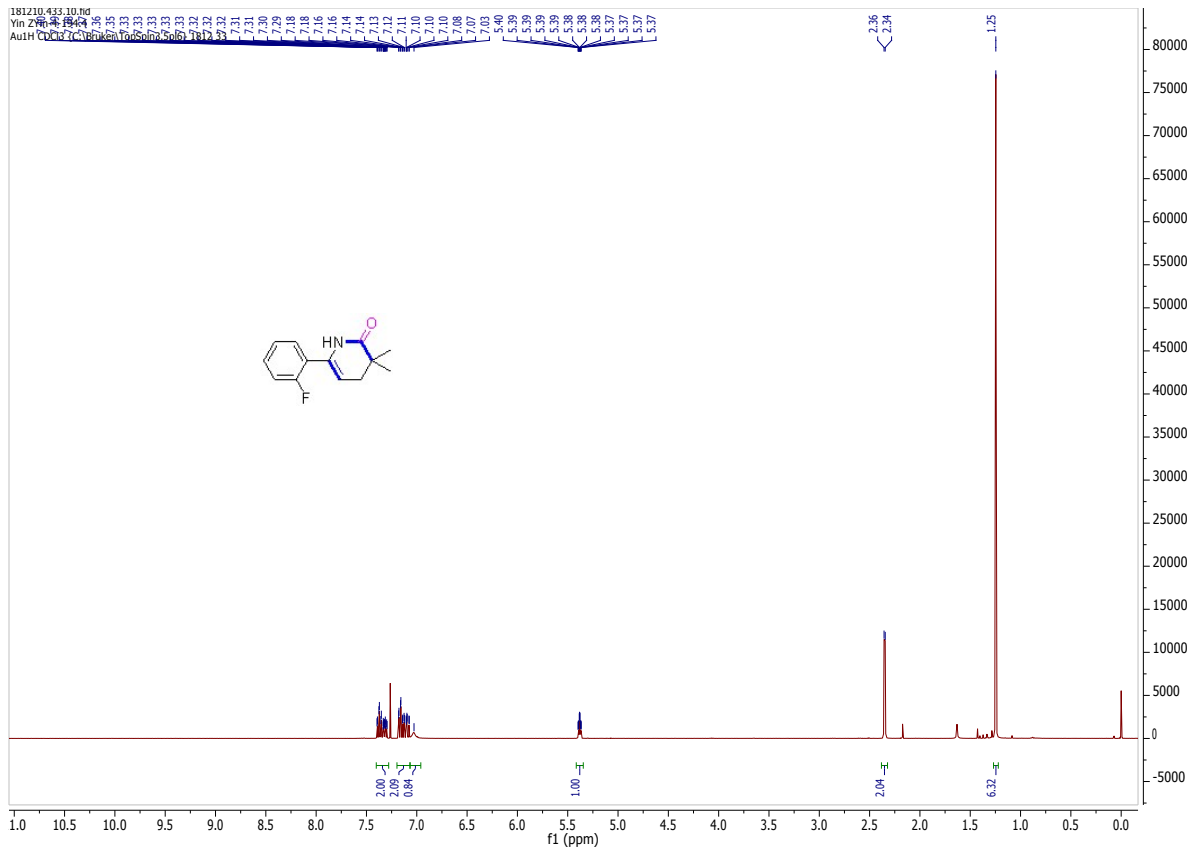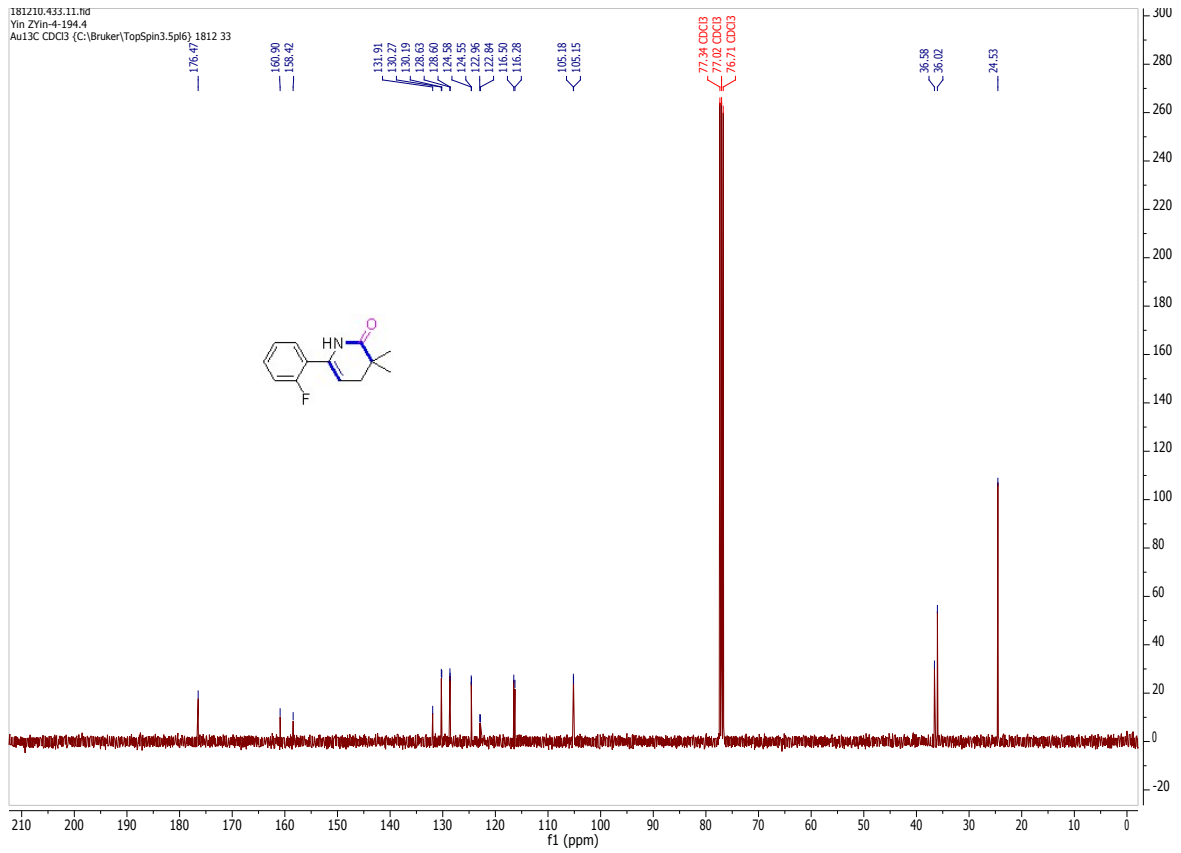

181218.1309.12.fid  
Zhiping Yin zyin-4-194.4  
F19 CDCl3 (C:\Bruker\TopSpin3.6.0) 1812 9

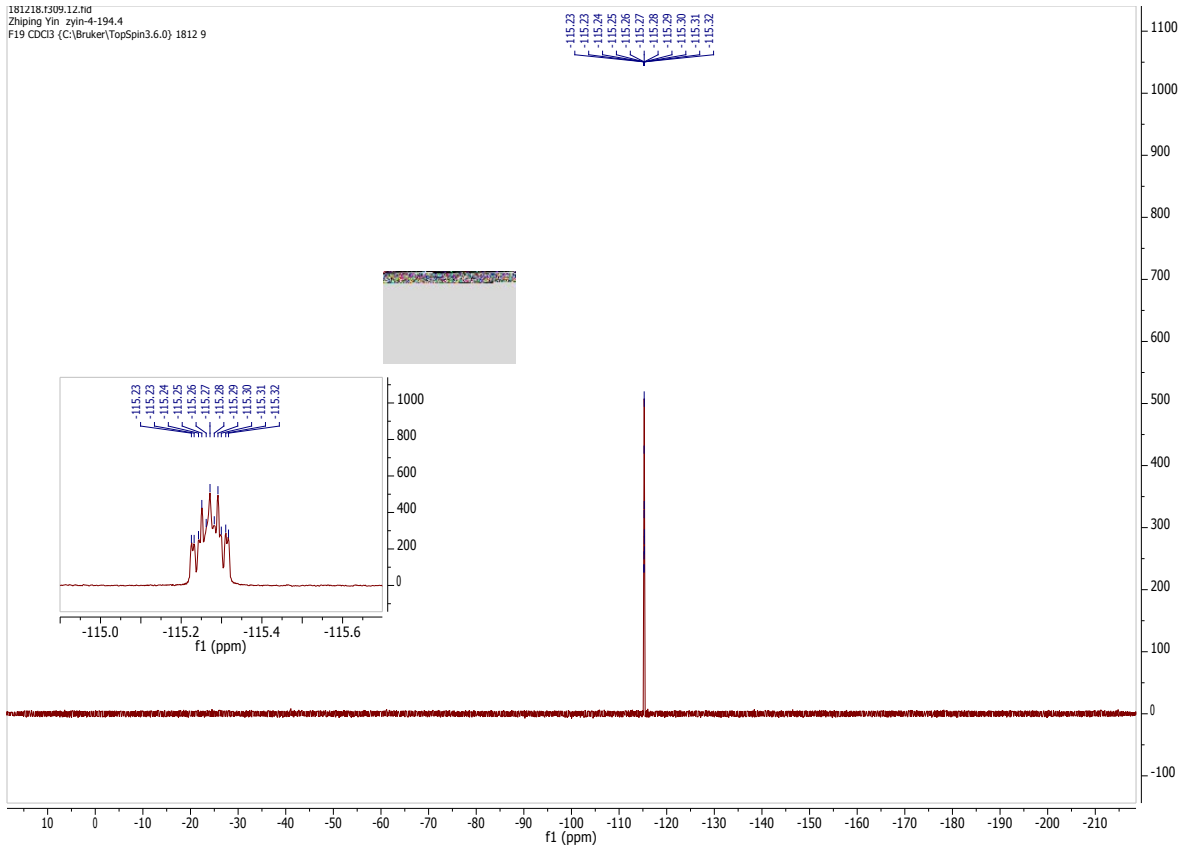

190218.1323.10.fid  
Zhiping Yin zyin-5-36.7  
PROTON CDCl3 (C:\Bruker\TopSpin3.6.0) 1902 23

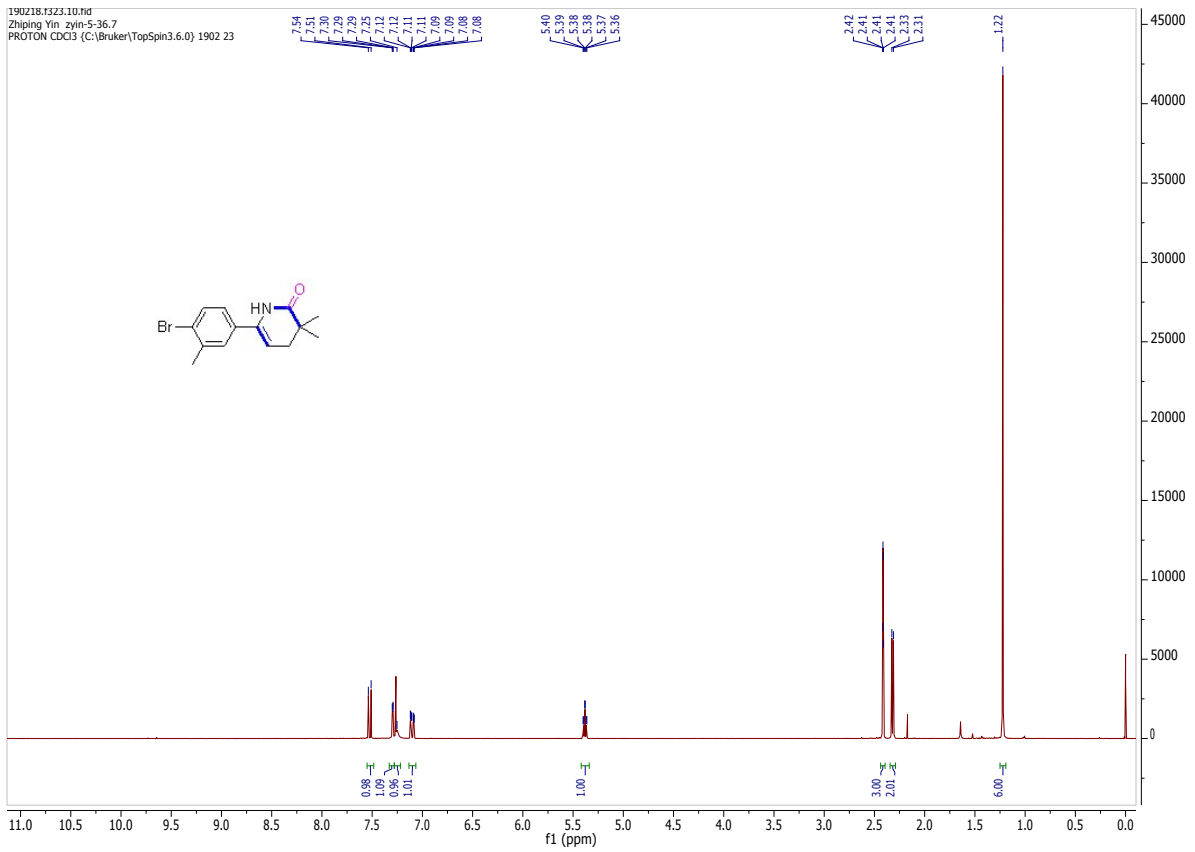

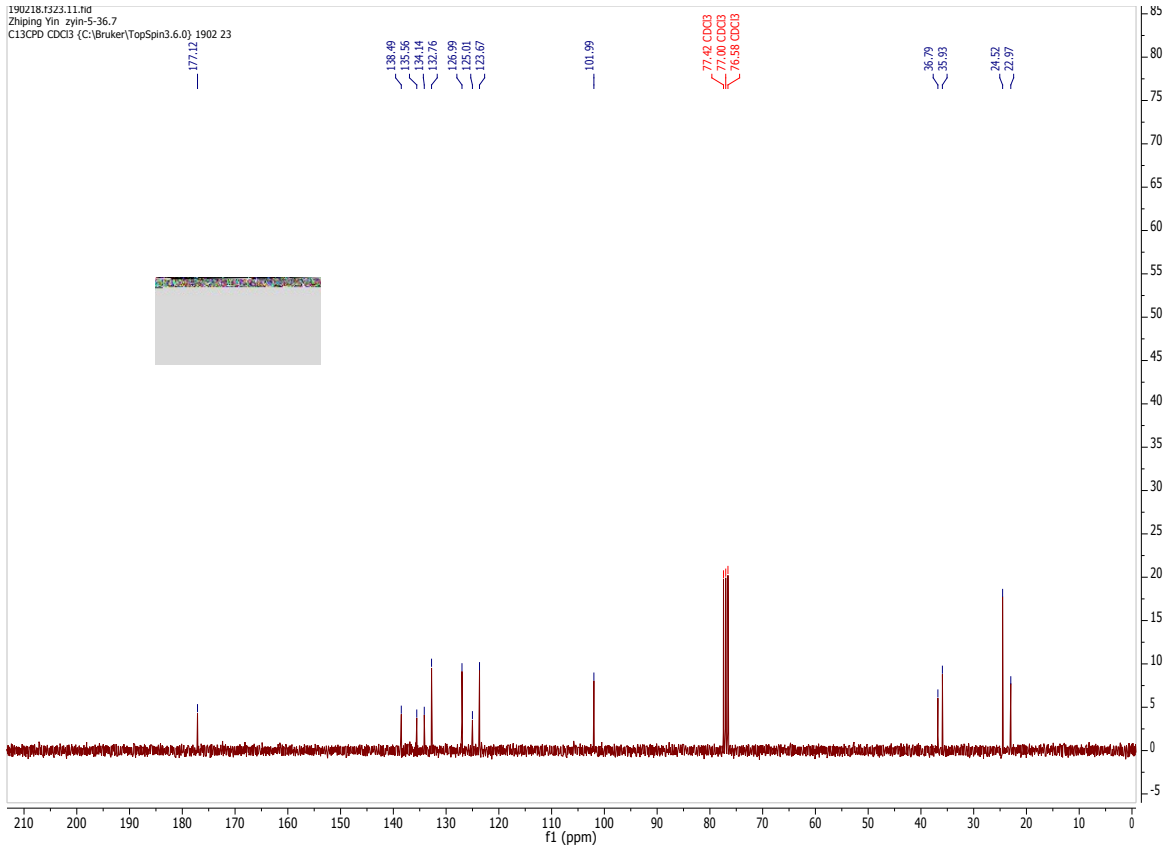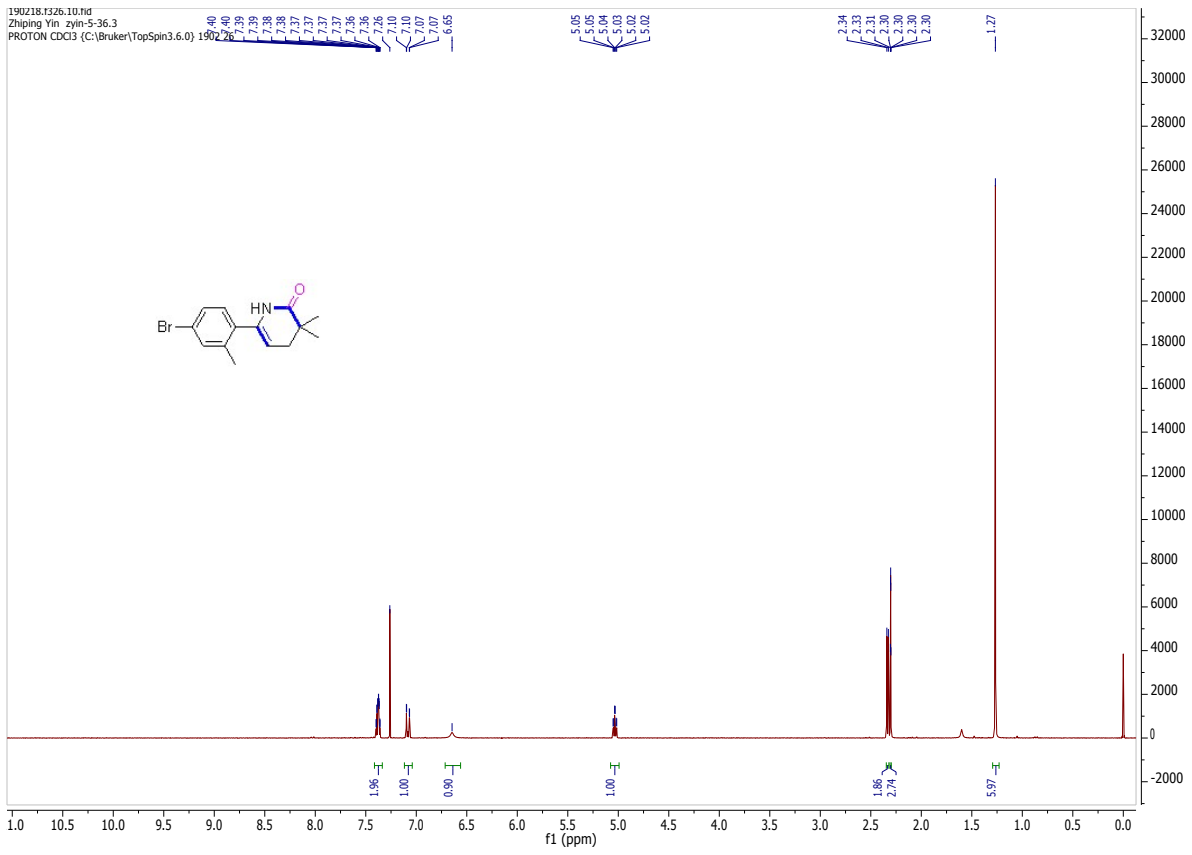

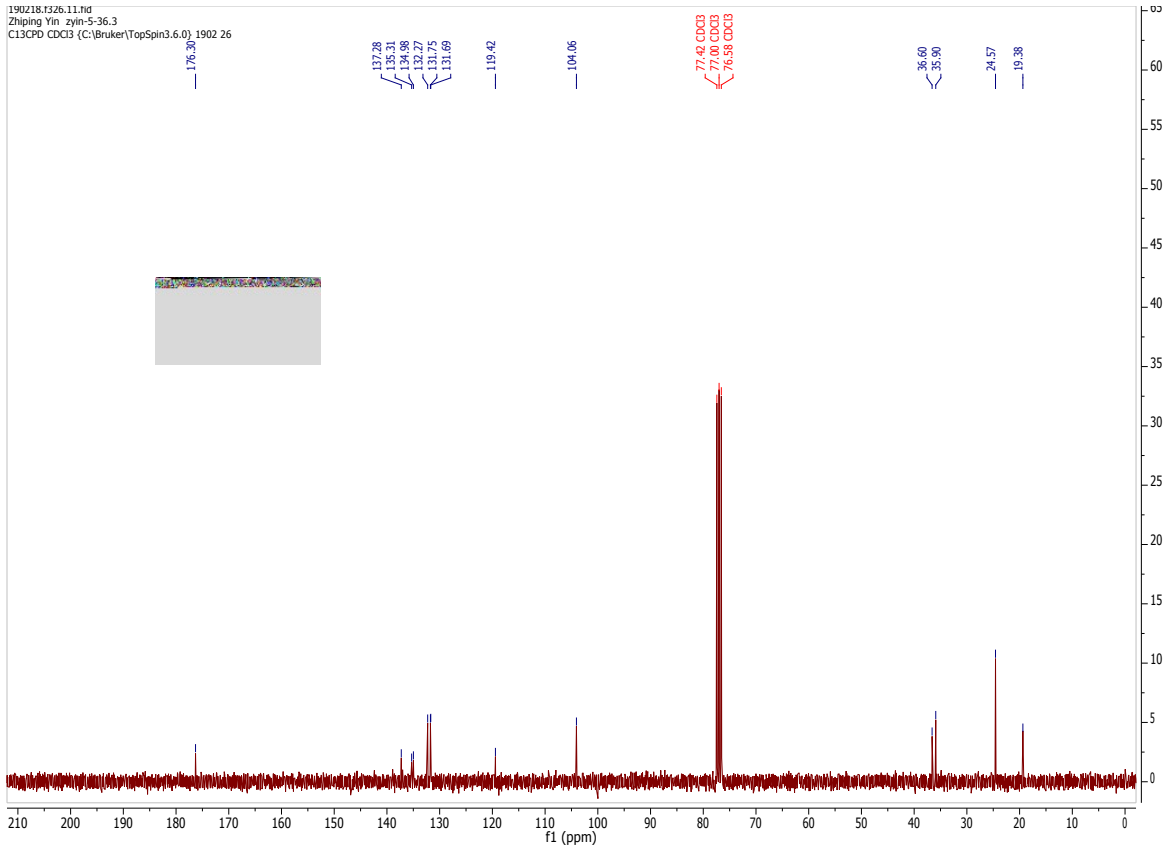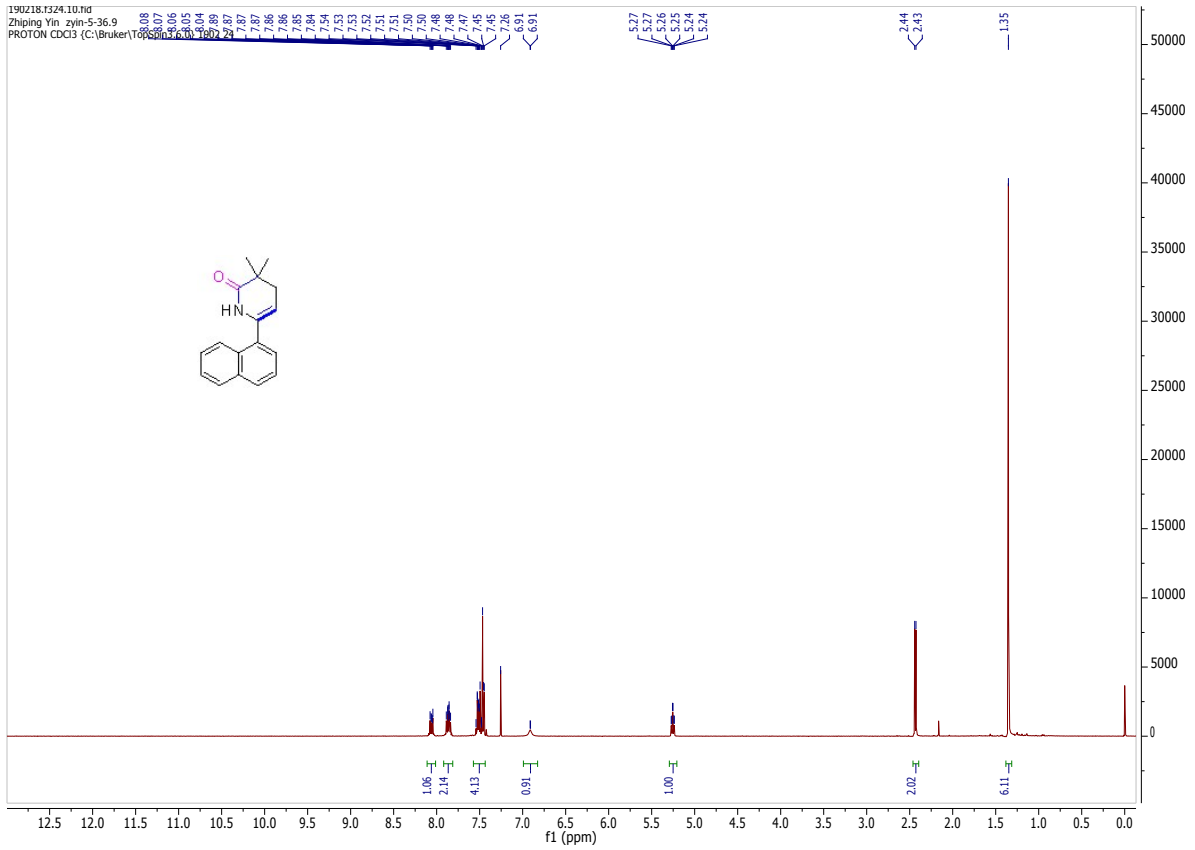

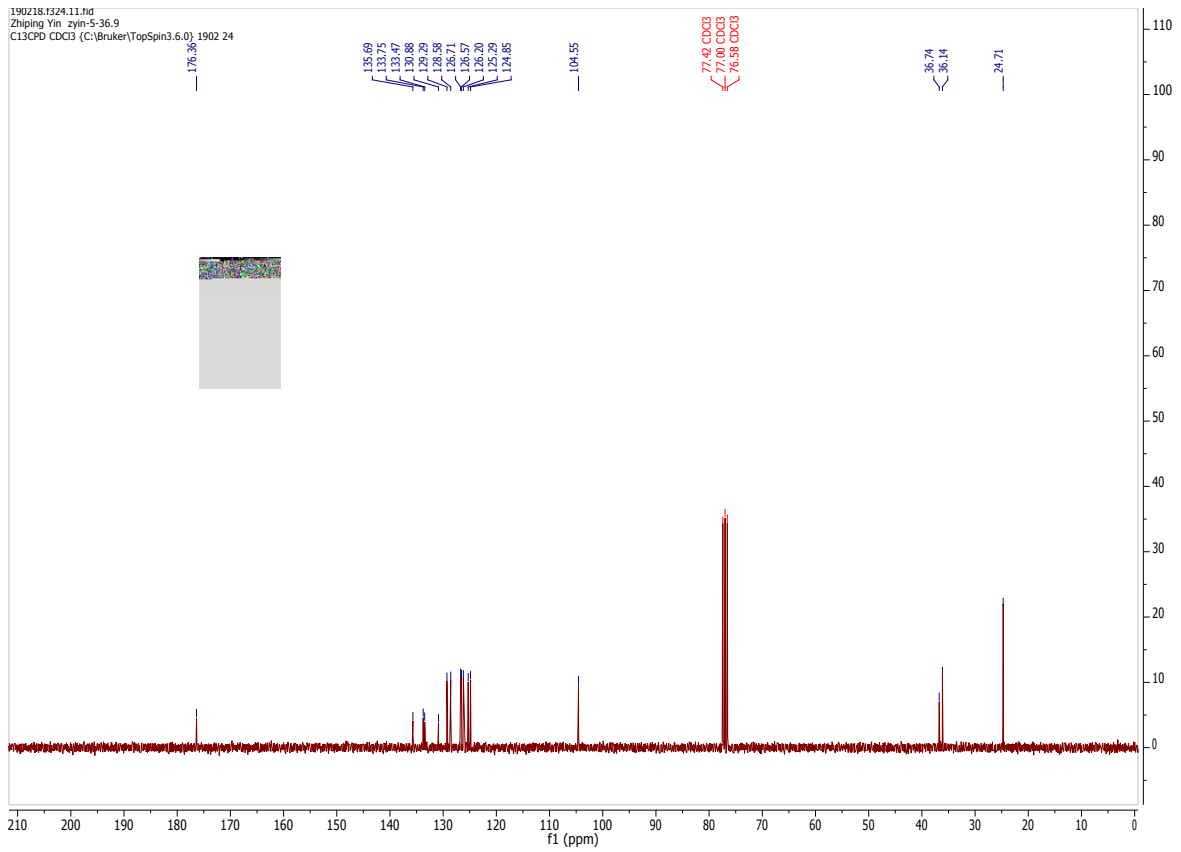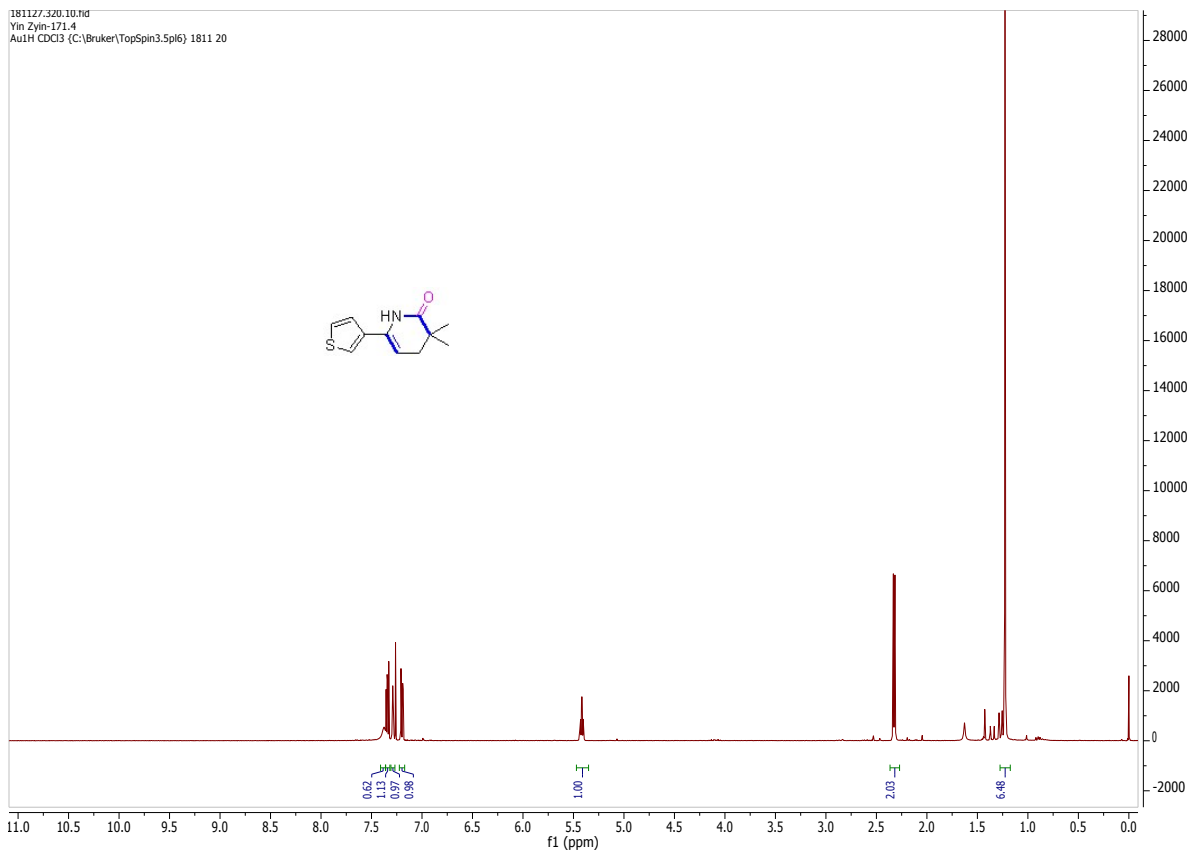

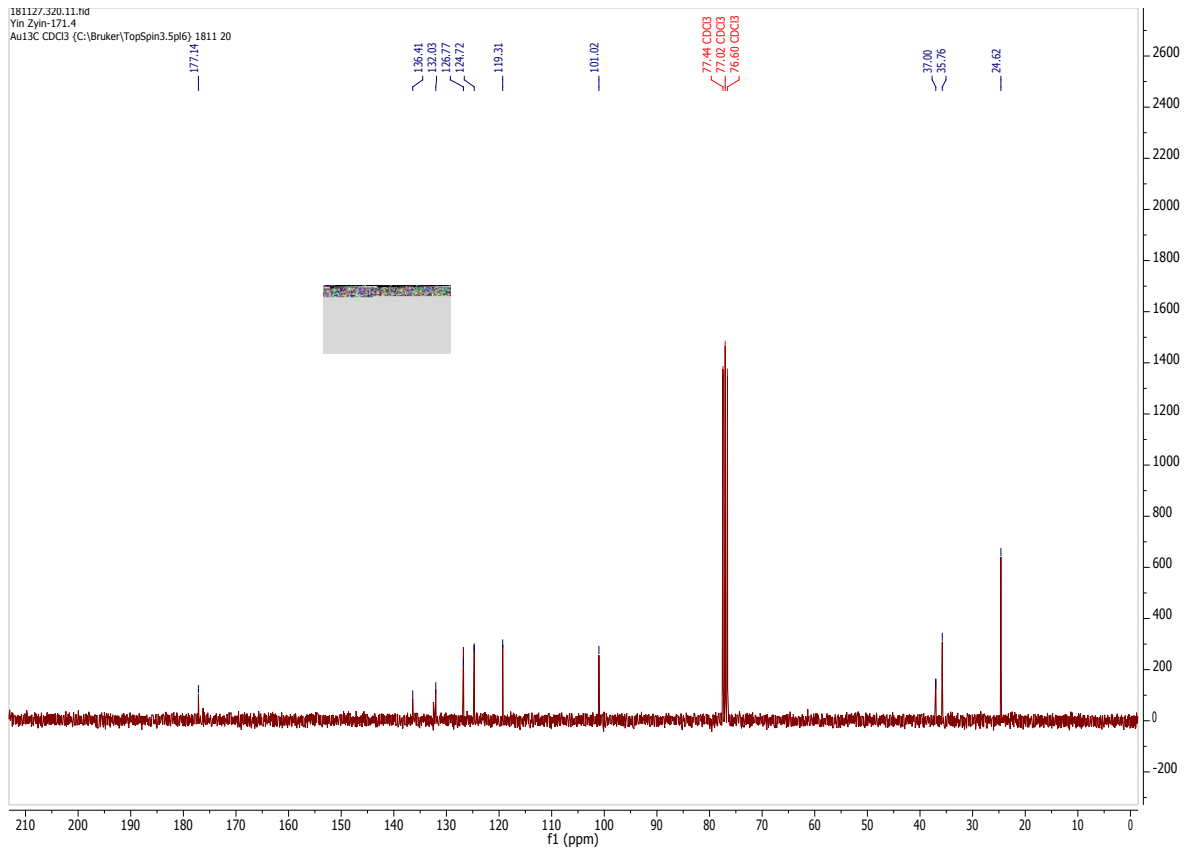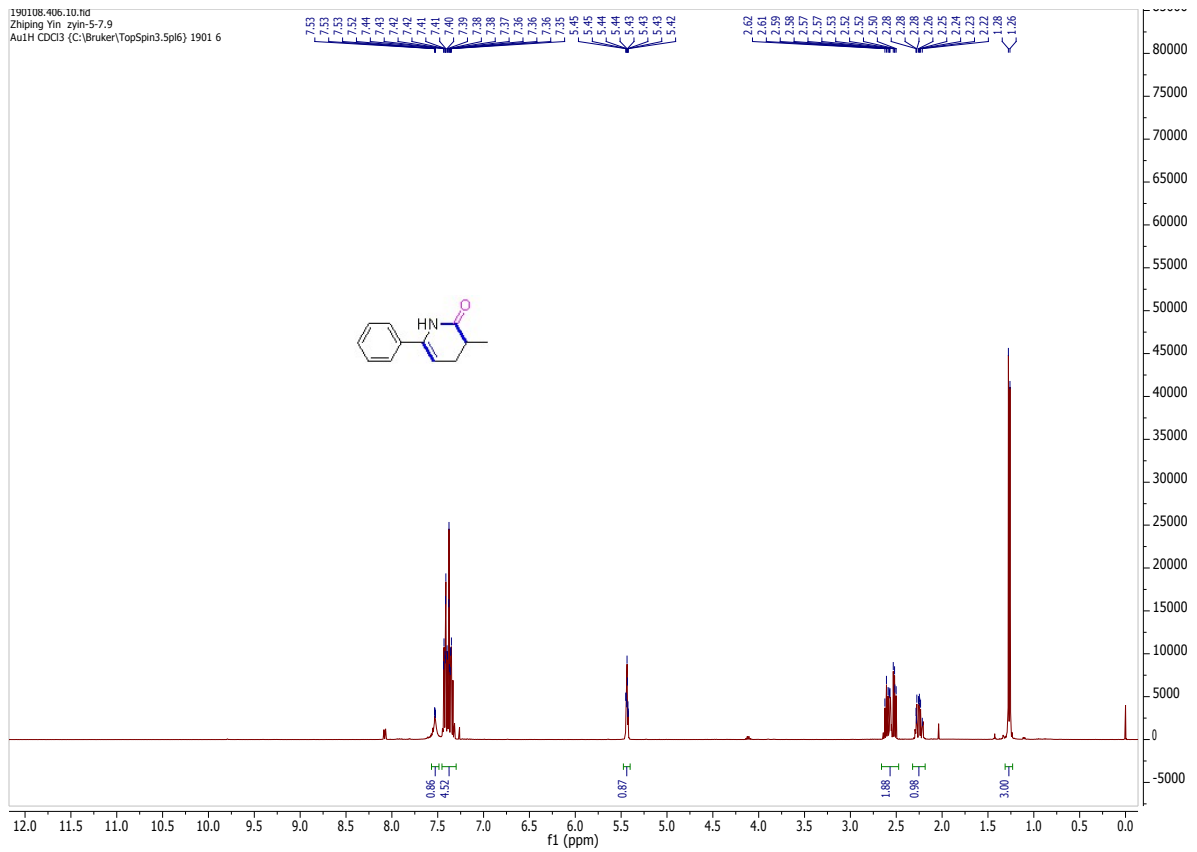

190108-406.11.nd  
Zhiping Yin zyin-5-7.9  
Au13C CDCl3 (C:\Bruker\TopSpin3.5\pl6) 1901.6

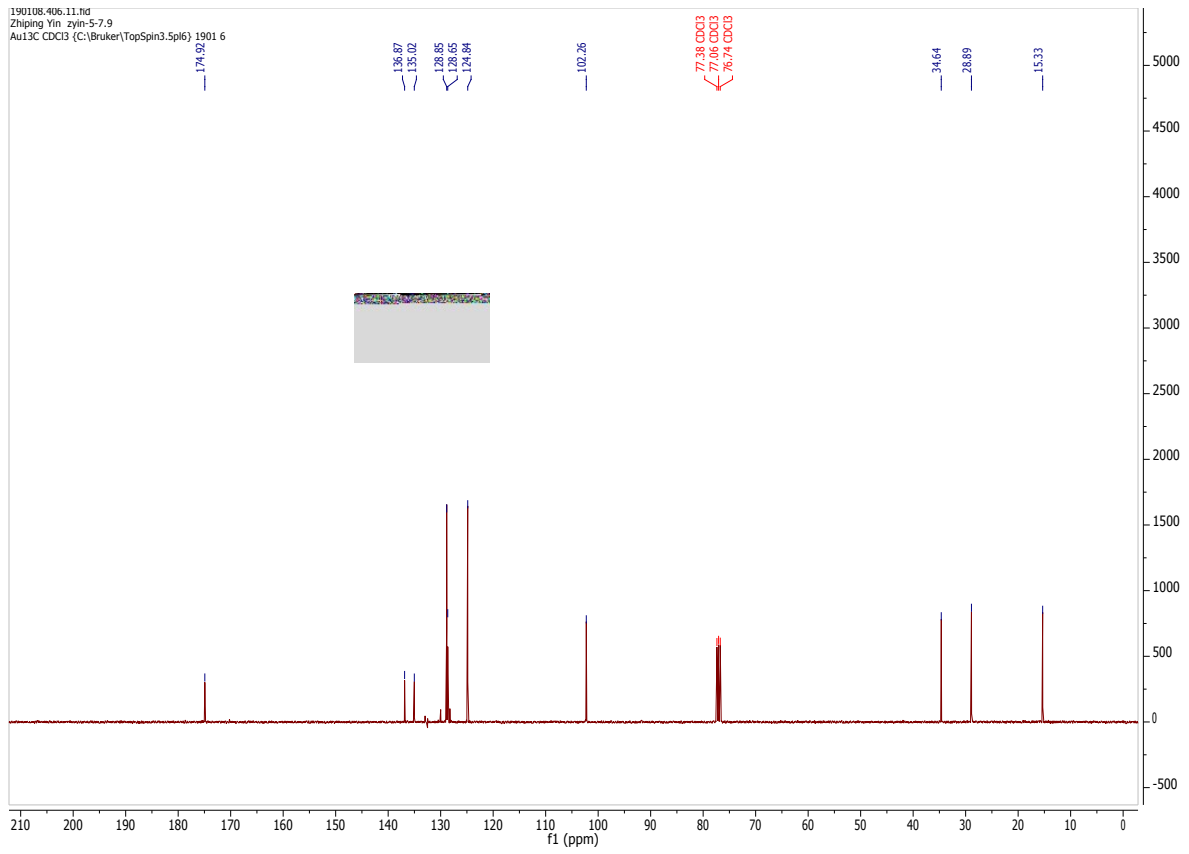

Supplement: c9cc02112d1.pdf [file c9cc02112d1.pdf]
